1 **No evidence for adaptation to local rhizobial mutualists in the**  
2 **legume *Medicago lupulina***

3 Tia L. Harrison<sup>1\*</sup>, Corlett W. Wood<sup>1\*</sup>, Isabela L. Borges<sup>1</sup>, and John R. Stinchcombe<sup>1,2</sup>

4

5 <sup>1</sup> Department of Ecology and Evolutionary Biology, University of Toronto, Toronto, Ontario

6 M5S3B2, Canada

7 <sup>2</sup> Centre for Genome Evolution and Function, University of Toronto, Toronto, Ontario,

8 M5S3B2, Canada

9 \* These authors contributed equally to this work.

10

11 *Running title:* Symbiont adaptation in *Medicago lupulina*

12

13 *Corresponding author:* Corlett W. Wood

*Address:*

*Fax:* 1 (416) 978-5878

Department of Ecology & Evolutionary Biology

*Phone:* 1 (647) 936-0565

University of Toronto

*Email:* [corlett.wood@utoronto.ca](mailto:corlett.wood@utoronto.ca)

25 Willcocks Street, Room 3055

Toronto, ON

Canada M5S 3B2

14

15 **Keywords**

16 Coevolution, legume, rhizobia, reciprocal inoculation, genome scan, mutualism

17 **Abstract**

18 Local adaptation is a common but not ubiquitous feature of species interactions, and  
19 understanding the circumstances under which it evolves illuminates the factors that influence  
20 adaptive population divergence. Antagonistic species interactions dominate the local adaptation  
21 literature relative to mutualistic ones, preventing an overall assessment of adaptation within  
22 interspecific interactions. Here, we tested whether the legume *Medicago lupulina* is adapted to  
23 the locally abundant species of mutualistic nitrogen-fixing bacteria ("rhizobia"), which vary in  
24 frequency across its eastern North American range. We reciprocally inoculated northern and  
25 southern *M. lupulina* genotypes with the northern (*Ensifer medicae*) or southern bacterium (*E.*  
26 *meliloti*) in a greenhouse experiment. Neither northern nor southern plants produced more seeds,  
27 flowered earlier, or were more likely to flower when inoculated with their local rhizobium  
28 species, although plants produced more root nodules (the structures that house the bacteria) with  
29 their local rhizobia. We used a pre-existing dataset to perform a genome scan for loci that  
30 showed elevated differentiation between field-collected plants that hosted different bacteria.  
31 None of the loci we identified belonged to the well-characterized suite of legume-rhizobia  
32 symbiosis genes, suggesting that the rhizobia do not drive genetic divergence between *M.*  
33 *lupulina* populations. Our results demonstrate that symbiont local adaptation is weak in this  
34 mutualism despite large-scale geographic variation in the identity of the interacting species.  
35

## 36 **Introduction**

37           Characterizing the circumstances under which local adaptation evolves informs our  
38 understanding of the relative importance of gene flow and selection, and thereby the extent and  
39 limitations of adaptive evolution (Antonovics, 1976; Bridle & Vines, 2007; Hereford, 2009;  
40 Savolainen *et al.*, 2013; Whitlock, 2015). However, existing tests of local adaptation to the biotic  
41 environment focus disproportionately on antagonistic interactions (but see Anderson *et al.* 2004,  
42 Hoeksema and Thompson 2007, Barrett *et al.* 2012), limiting our understanding of adaptation  
43 within the broad suite of interspecific interactions that occur in nature. Here we performed a  
44 reciprocal inoculation experiment to test for local adaptation in a classic mutualism: the  
45 symbiosis between legumes and nitrogen-fixing bacteria.

46           Local adaptation—when native genotypes outperform foreign genotypes in their home  
47 environment (Hereford 2009)—is driven by differences in selection in alternative environments,  
48 and is reflected in divergent phenotypes and genotypes between populations. The literature on  
49 local adaptation between interacting species is dominated by antagonistic species interactions  
50 such as those between hosts and their parasites, pathogens, or prey (Brodie *et al.*, 2002; Kawecki  
51 & Ebert, 2004; Hoeksema & Forde, 2008; Koskella *et al.*, 2012). Direct tests of symbiont local  
52 adaptation in mutualisms are rare (Hoeksema & Forde, 2008; Brockhurst & Koskella, 2013).  
53 Nevertheless, several lines of evidence suggest that adaptation to the local mutualist is a common  
54 feature of positive species interactions. Phenotype matching between local plant and pollinator  
55 communities is pervasive (Anderson *et al.*, 2009; Gómez *et al.*, 2009; Koski & Ashman, 2015),  
56 and a recent reciprocal translocation experiment showed that a plant's reproductive success is  
57 highest in its local pollinator community (Newman *et al.*, 2015). In the classic mutualism

58 between leguminous plants and nitrogen-fixing bacteria, genotype-by-genotype interactions—  
59 when fitness depends jointly on the genotypes of both partners—account for a substantial  
60 proportion of genetic variation in fitness-related traits within plant populations (Heath, 2010;  
61 Heath *et al.*, 2012; Ehinger *et al.*, 2014). On a broad geographic scale, these interactions are  
62 predicted to manifest as symbiont local adaptation when coupled with population differences in  
63 symbiont genotype frequencies (Heath & Nuismer, 2014).

64         Ultimately, though, directly testing for symbiont local adaptation in mutualisms requires  
65 assaying the fitness consequences of sympatric and allopatric symbionts in a reciprocal  
66 inoculation experiment (Heath & Stinchcombe, 2014). The diagnostic signature of symbiont  
67 local adaptation in these experiments is a genotype-by-genotype interaction for fitness, indicating  
68 that the fitness of one partner depends on the identity of its symbiont (Clausen *et al.*, 1940;  
69 Clausen & Hiesey, 1958; Kawecki & Ebert, 2004). Although these experiments are frequently  
70 used to test for parasite local adaptation in antagonistic interactions (reviewed in Hoeksema and  
71 Forde 2008), they are less commonly used to test for mutualist local adaptation (but see  
72 (Hoeksema & Thompson, 2007; Johnson *et al.*, 2010; Barrett *et al.*, 2012; Newman *et al.*,  
73 2015)).

74         The economically and ecologically important mutualism between legumes in the genus  
75 *Medicago* and nitrogen-fixing bacteria ("rhizobia") is well suited to testing for adaptation to the  
76 local mutualist (Cook *et al.*, 1997; Cook, 1999; Young *et al.*, 2011). In the facultative *Medicago*-  
77 rhizobia symbiosis, soil bacteria in the genus *Ensifer* (formerly *Sinorhizobium*) (Young, 2010)  
78 fix atmospheric nitrogen for their plant hosts in exchange for carbohydrates and housing in  
79 specialized root organs called nodules (Mylona *et al.*, 1995; van Rhijn & Vanderleyden, 1995).

80 In eastern North America the relative frequencies of two principal symbionts (*Ensifer medicae*  
81 and *E. meliloti*) (Béna *et al.*, 2005) vary along a latitudinal cline (Figure S1) (Harrison *et al.*,  
82 2017), which may generate strong selection on *Medicago* populations to adapt to their local  
83 *Ensifer* species. The bacteria are essential for plant growth in nitrogen-poor edaphic  
84 environments (Simonsen & Stinchcombe, 2014a), and genes mediating the association  
85 experience strong selection in both *Medicago* and *Ensifer* (Bailly *et al.*, 2006; De Mita *et al.*,  
86 2007; Epstein *et al.*, 2012; Bonhomme *et al.*, 2015). Finally, there is substantial evidence for  
87 genotype-by-genotype interactions for fitness traits between *Medicago truncatula* and its *Ensifer*  
88 symbionts (Heath, 2010; Gorton *et al.*, 2012; Heath *et al.*, 2012), and suggestive evidence for  
89 some degree of co-speciation in the two genera (Béna *et al.*, 2005).

90 In the present study, we performed a reciprocal inoculation experiment to test for  
91 adaptation to the local rhizobia species in the black medic (*Medicago lupulina*). We tested the  
92 effect of sympatric and allopatric rhizobia on plant fitness in a greenhouse experiment. We  
93 measured traits closely associated with plant fitness (seed production) and rhizobial fitness  
94 (number of nodules formed with the plant host) to examine plant adaptation to their local  
95 rhizobial species and rhizobial adaptation to their local plant populations, respectively. Second,  
96 we took advantage of an existing genomic data set and performed a genome scan for loci that  
97 exhibited elevated differentiation between field-collected plants associated with different  
98 bacterial species in natural populations. Genome scans identify loci that exhibit heightened  
99 differentiation between populations inhabiting alternative environments, which are presumed to  
100 constitute the genetic basis of local adaptation (Coop *et al.*, 2010; Günther & Coop, 2013;  
101 Savolainen *et al.*, 2013; Tiffin & Ross-Ibarra, 2014). Unlike reciprocal inoculation experiments,

102 these tests integrate across generations and ancillary environmental variation, capturing the  
103 cumulative effects of long-term selection in alternative environments (Tiffin & Ross-Ibarra,  
104 2014; de Villemereuil *et al.*, 2015; Jensen *et al.*, 2016).

105 Neither the phenotypic nor genomic approaches revealed strong evidence of adaptation to  
106 the local rhizobia in *M. lupulina*. We found suggestive evidence that the rhizobia may be adapted  
107 to their local plant populations; plants formed more nodules with rhizobia from the same  
108 geographic region. However, overall our data suggest that symbiont local adaptation appears to  
109 be weak or absent in this mutualism's North American range.

110

## 111 **Materials and Methods**

### 112 *Study system*

113 *Medicago lupulina* is an annual, highly self-fertilizing legume native to Eurasia  
114 (Turkington & Cavers, 1979; Yan *et al.*, 2009). After its introduction to North America in the  
115 1700s, *M. lupulina* expanded its range to occupy nitrogen-poor areas of the continent's temperate  
116 and subtropical regions (Turkington & Cavers, 1979). *Medicago* has a short generation time  
117 (Turkington & Cavers, 1979), its rhizobia are easily manipulated (Heath & Tiffin, 2007), an  
118 annotated genome is available in the genus (Young *et al.*, 2011), and the genes involved in the  
119 rhizobial mutualism are extensively characterized (Mylona *et al.*, 1995; Cook *et al.*, 1997;  
120 Young *et al.*, 2011).

121 The relative frequencies of *M. lupulina*'s two symbiotic rhizobia species (*Ensifer medicae*  
122 and *E. meliloti*) vary along a northwest-to-southeast cline in eastern North America (Figure S1)  
123 (Harrison *et al.*, 2017). Moreover, there is very little genetic diversity within each *Ensifer* species

124 at neutral sites and at known symbiosis genes (Harrison *et al.*, 2017). Whole-genome sequencing  
125 of *Ensifer* strains sampled from the same populations used in the present study found that neutral  
126 diversity extremely low in *E. medicae* ( $\pi_{\text{synonymous}} = 0.0006$  and in *E. meliloti* ( $\pi_{\text{synonymous}} =$   
127  $0.0001$ ). Crucially, there was also very little diversity in genes known to be involved in the  
128 legume-rhizobia symbiosis. There were few or no SNPs in any nodulation genes (nodA, -B, or -  
129 C), nitrogen fixation genes (nifA, -B, -D, -E, -H, -N, or -X), or type III effector genes in either *E.*  
130 *medicae* ( $\pi \leq 0.0004$  for these genes) or *E. meliloti* ( $\pi \leq 0.0002$ ). Taken together, this evidence  
131 suggests that there is very little functional diversity within *Ensifer* species in North America, so  
132 we only tested a single strain per species in the reciprocal inoculation experiment described  
133 below.

134

### 135 *Reciprocal inoculation experiment*

136 To test for adaptation to the local rhizobia, we inoculated *M. lupulina* genotypes from the  
137 northern and southern portions of the plant's eastern North American range with either the  
138 locally abundant rhizobium species in the north (*E. medicae*) or in the south (*E. meliloti*). From a  
139 total of 39 *M. lupulina* populations sampled between Delaware and Ontario in September-  
140 October of 2013 (Harrison *et al.*, 2017), we selected 7 southern and 7 northern plant populations  
141 in which Harrison *et al.* (2017) detected only a single *Ensifer* species (Figure 2, Table S1; see  
142 Figure S1 for a complete map with all 39 sampled populations). Within each population, seeds  
143 and root nodules were collected from 2-10 randomly chosen *M. lupulina* individuals. All  
144 sampled plants were at least 0.5m apart. Nodules were stored at 4°C in plastic bags until they  
145 were processed. Field-collected seeds from these populations were grown in the greenhouse for

146 one generation to reduce maternal and environmental effects from the field, and we performed  
147 our experiments using the progeny of these greenhouse-grown plants.

148         We planted F<sub>1</sub> greenhouse-derived seeds of 43 maternal families (27 from the north and  
149 16 from the south) in a split-plot randomized complete block design in the greenhouse at the  
150 University of Toronto. Seedlings were planted with sterile forceps into cone-tainers filled with  
151 sand (autoclaved twice at 121°C). *Medicago lupulina* naturally colonizes sandy soils (Turkington  
152 and Cavers 1979), and the plants rely heavily on nitrogen supplied by their rhizobial symbionts  
153 under these conditions because sand is a nitrogen-poor substrate (Heath et al. 2010). Each block  
154 was divided into two bacterial treatments, each containing 15 northern and 11 southern plants,  
155 the locations of which were randomized within blocks. Populations were split across blocks. Due  
156 to seed limitations, not all families were represented in every block, but within a block both  
157 bacterial treatments comprised the same 26 families. We replicated this design across six blocks,  
158 for a total of 312 plants (6-13 replicates per family for 37 families; 1-4 replicates per family for 6  
159 families). An additional block containing 42 plants (33 from the north and 9 from the south)  
160 served as an inoculation control, and a means for estimating plant performance and fitness in the  
161 absence of either bacterial species. Prior to planting, seeds were scarified with a razor blade,  
162 sterilized with ethanol and bleach, and stratified on 8% water agar plates at 4°C for 7 days to  
163 germinate. We misted seedlings with water daily and fertilized with 5mL of nitrogen-free  
164 Fahraeus medium ([noble.org/medicagohandbook](http://noble.org/medicagohandbook)) twice before inoculation with rhizobia.

165         The *Ensifer* strains used for inoculation were recovered from frozen samples collected by  
166 Harrison et al. (2017) from two of the populations used in our experiment. The strains were  
167 originally cultured from field-collected root nodules by sterilizing one nodule per plant in



168 ethanol and bleach, and crushing and plating it onto a 2% tryptone yeast (TY) agar plate. Strains  
169 were re-streaked onto TY agar four times to reduce contamination and grown at 30°C for 48  
170 hours, after which they were transferred to liquid TY media and cultured for two days at 30°C.  
171 To identify each strain to species (*E. medicae* or *E. meliloti*), DNA was extracted from liquid  
172 cultures (cell density:  $8 \times 10^8$  cells/ml) using the MoBio UltraClean Microbial DNA Isolation  
173 Kit, whole-genome sequenced at SickKids Hospital (Toronto, Ontario), and genotyped using  
174 GATK (McKenna *et al.*, 2010). We used alignment scores and the *Ensifer* 16S locus (Rome *et*  
175 *al.*, 1997) to determine species identity of rhizobia strains associated with the sampled plants.

176 We selected one *E. medicae* strain from the northernmost population in Ontario and one  
177 *E. meliloti* strain from the southernmost population in Delaware for our experiment ("SEG" and  
178 "DE" in Figure 2). Genetic diversity is very low among strains within *Ensifer* species across  
179 North America (see "Study system" above) (Harrison *et al.*, 2017), so the specific strains used  
180 are not likely to influence our results. Prior to inoculation, these strains were cultured as  
181 described above from samples stored at -80°C. Liquid cultures were diluted with sterile TY  
182 media to an OD600 reading of 0.1 (a concentration of  $\sim 10^6$  cells per mL) (Simonsen &  
183 Stinchcombe, 2014b). Each plant received 1 mL of inoculate 13 days after planting, and 1 mL  
184 again 10 days later. Controls were also inoculated twice with sterile TY media 10 days apart, and  
185 were used to assess rhizobia contamination across treatments. Throughout the remainder of the  
186 experiment, all plants were bottom-watered three times a week. We used two bottom-watering  
187 trays per block, such that all plants in a given bacterial treatment had the same tray, while those  
188 from the alternative bacterial treatment had a different tray.

189           We scored mortality weekly throughout the experiment, counted the number of leaves  
190 every 4 weeks, recorded the date of first flower, and collected seeds. After five months, which  
191 approximates the length of the April-October growing season in southern Ontario (Turkington &  
192 Cavers, 1979), we harvested all plants and collected any remaining unripe seeds. We dried and  
193 weighed aboveground tissue from each plant to the nearest 0.1 mg, and counted all seeds and  
194 root nodules (symbiotic organs housing the rhizobia).

195           We analyzed five traits to test whether northern and southern *M. lupulina* plants were  
196 adapted to their local rhizobium: number of seeds, aboveground biomass, flowering time  
197 (excluding plants that did not flower), probability of flowering, and number of nodules. All  
198 analyzes were performed in R v.3.2.4 with sum-to-zero contrasts ("contr.sum") (R Core Team,  
199 2016), and we tested significance using type III sums of squares in the function Anova in the *car*  
200 package (Fox & Weisberg, 2011). Log-transformed aboveground biomass and flowering time  
201 were analyzed with general linear mixed models using the function lmer in the *lme4* package  
202 (Bates *et al.*, 2015). Probability of flowering and number of nodules were analyzed with  
203 generalized linear mixed models with binomial and Poisson error distributions, respectively,  
204 using the function glmer in the *lme4* package (Bates *et al.*, 2015). We verified that all dependent  
205 variables met the assumptions of linearity, normality, and homoscedasticity through visual  
206 inspection of quantile-quantile plots, plots of the residuals versus fitted values, and scale-location  
207 plots. Seed number was severely zero-inflated (42% of plants did not produce seeds), so we  
208 analyzed it using a mixture model (see below).

209           Each of the above models included rhizobia treatment (*E. medicae* or *E. meliloti*), region  
210 (north or south), and the rhizobia-by-region interaction as fixed effects. A significant rhizobia-

211 by-region interaction, in which northern plants have higher fitness when inoculated with *E.*  
212 *medicae* and southern plants have higher fitness with *E. meliloti*, would be evidence for symbiont  
213 local adaptation. We included a fixed effect of researcher in our analysis of nodule counts.  
214 Block, population, and family nested within population were included as random effects. We  
215 also included the block-by-treatment interaction as a random effect because the rhizobia  
216 treatment was applied at the half-block rather than at the plant level (Altman & Krzywinski,  
217 2015). While this design provides a weaker test of the rhizobia main effect, it is sensitive to the  
218 detection of rhizobia-by-region interactions, the main goal of our experiment (Altman &  
219 Krzywinski, 2015). We tested the significance of the population and family random effects in our  
220 analyses of biomass, number of nodules, and flowering time using likelihood ratio tests in which  
221 we compare the full model to reduced models without the random effects. Because these  
222 likelihood ratio tests test a null hypothesis located at the boundary of parameter space (i.e., a  
223 variance of zero), the p-values produced by these tests are twice what they should be, so we  
224 divided these p-values in half (Bolker *et al.*, 2009).

225 We analyzed seed number with a zero-inflated Poisson model implemented with the  
226 function `MCMCglmm` in the package *MCMCglmm* (Hadfield, 2010). Zero-inflated models are a  
227 type of mixture model in which the zero class is modeled as the combined result of binomial and  
228 count processes (Zuur *et al.*, 2009). In *MCMCglmm*, zero-inflated Poisson GLMMs are fit as  
229 multi-response models with one latent variable for the binomial zero-generating process and one  
230 for the Poisson count-generating process (Hadfield, 2015). We fit a model for seed number that  
231 included fixed effects of rhizobia, region, the rhizobia-by-region interaction, and the reserved  
232 `MCMCglmm` variable "trait" that indexes the binomial and Poisson latent variables. We omitted

233 the interaction between trait and other fixed effects in order to estimate a single effect of  
234 rhizobia, region, and the rhizobia-by-region interaction across both the binomial and Poisson  
235 processes. Block, population, family, and the block-by-treatment effect were included as random  
236 effects. Different random effect variances were fit to the binomial and Poisson processes using  
237 the "idh" variance structure in MCMCglmm (Hadfield, 2015). We fit a residual variance (R)  
238 structure using the argument `rcov = ~ us(trait):units`, which allows a unique residual for all  
239 predictors in the model, used the default priors for the fixed effects (mean = 0, variance =  $10^{10}$ )  
240 and specified parameter-expanded priors (`alpha.mu = 0`, `alpha.v = 1000`) for the random effects  
241 (Hadfield, 2010).

242 We ran the model for 1,300,000 iterations, discarded the first 300,000 iterations, and  
243 stored every 1,000<sup>th</sup> iterate. Model convergence was assessed with traceplots, running mean  
244 plots, and autocorrelation plots of the fixed and random effects using the *coda* (Plummer *et al.*,  
245 2006) and *mcmcplots* (McKay Curtis, 2015) packages. Even though we used parameter-  
246 expanded priors on the random effects, the estimates of the population and block random effects  
247 remained close to zero, but omitting these terms from our model did not qualitatively change the  
248 results. We assessed significance of the population and family random effects in our analysis of  
249 seed number by comparing the Deviance Information Criteria (DIC; a Bayesian analog of AIC)  
250 of the full model to reduced models that omitted the random effects (Spiegelhalter *et al.*, 2002;  
251 Bolker *et al.*, 2009). We considered a random effects to be significant when the reduced model  
252 had  $\Delta$ DIC greater than two, indicating that it was a worse fit to the data than the full model  
253 (Spiegelhalter *et al.*, 2002).

254 Finally, we calculated pairwise correlations between all traits using Spearman's  
255 correlation on the family means for each trait. We obtained family means for biomass, flowering  
256 time, and number of nodules by extracting the conditional modes (also known as the best linear  
257 unbiased predictors, or BLUPs) for each level of the family random effect from the models  
258 described above. For number of seeds, we used the marginal posterior modes of the family  
259 random effect as our family mean estimates.

260

#### 261 *Genomic data set*

262 A limitation of using reciprocal inoculation experiments to test for symbiont local  
263 adaptation is that the fitness benefit of a symbiosis often depends on the biotic and abiotic  
264 environmental conditions in which it is expressed (Heath & Tiffin, 2007; Heath *et al.*, 2010;  
265 Porter *et al.*, 2011; Barrett *et al.*, 2012; Simonsen & Stinchcombe, 2014a). To address this  
266 limitation, we took advantage of a pre-existing *M. lupulina* SNP dataset collected by Harrison *et*  
267 *al.* (2017) to perform genomic scans in *M. lupulina*. The goal of this analysis was to determine  
268 whether genes involved in the legume-rhizobia symbiosis are differentiated between plants  
269 associated with different *Ensifer* species in natural populations, a pattern that would be consistent  
270 with symbiont local adaptation.

271 Details on SNP discovery methods can be found in Supplemental Methods (Appendix 1),  
272 Harrison *et al.* (2017). In brief, field-collected seeds from 73 *M. lupulina* individuals were grown  
273 in the greenhouse as described in the "Reciprocal inoculation experiment" section above. We  
274 extracted DNA from leaf tissue collected from one individual per maternal line and samples were  
275 sequenced at Cornell University using genotyping-by-sequencing (GBS) in two Illumina flow

276 cell lanes (Elshire *et al.*, 2011). Genomic libraries were prepared with the restriction enzyme  
277 EcoT22I, and SNPs were called using the program Stacks (Catchen *et al.*, 2011, 2013). We  
278 extracted and sequenced rhizobia DNA from one nodule from each field-sampled plant, and  
279 determined the species identity of each strain as described in the "Reciprocal inoculation  
280 experiment" section above.

281         We searched for outlier loci between *M. lupulina* plants hosting *E. medicae* and *E.*  
282 *meliloti* to assess whether there is evidence for genetic divergence between plants associated  
283 with different *Ensifer* species. We used the program Bayenv2 to calculate  $X^T X$  statistics for each  
284 SNP in the *M. lupulina* sample (Coop *et al.*, 2010):  $X^T X$  is an  $F_{ST}$ -like statistic that controls for  
285 population variation and covariation in allele frequencies (i.e., population structure). We  
286 estimated the covariance matrix using 100,000 iterations. Because we only wanted to calculate  
287  $X^T X$  statistics and did not wish to calculate environmental correlations, we included an  
288 environmental file of dummy values to run Bayenv2 but avoid environmental analysis. We  
289 ranked SNPs from highest to lowest  $X^T X$  values and identified the top 1% of SNPs to BLAST  
290 against the reference genome of *M. truncatula* to identify the outlier loci involved in rhizobia  
291 association in *M. truncatula* (taxonomy ID 3880) (Tang *et al.*, 2014). We aligned to the *M.*  
292 *truncatula* genome to leverage its extensive genomic resources; *M. truncatula* is the closest  
293 relative of *M. lupulina* with a thoroughly mapped and annotated genome. We used nucleotide  
294 BLAST (blastn) to search somewhat similar sequences in the unannotated *M. truncatula* genome  
295 in order to retrieve chromosome positions for our outlier loci. To identify the orthologous gene  
296 associated with each outlier locus, we then looked up the chromosome position of each outlier in  
297 the annotated *Medicago truncatula* genome (Mt. 4.0 <http://jcvl.org/medicago/>). We performed

298 the outlier loci test in three ways. First, we characterized outlier loci using the range-wide sample  
299 of plants (73 plant individuals) and compared the results to outlier loci found using the southern  
300 Ontario samples (49 plant individuals) to account for possible covariance between environmental  
301 gradients and bacterial species composition. Second, because outlier loci are usually in linkage  
302 disequilibrium (LD) with the causal genes responsible for adaptation, we searched for legume-  
303 rhizobia symbiosis genes within 5 kb and 10 kb of our detected outlier loci (Branca *et al.* 2011).  
304 Third, we measured the distance in base pairs between the *M. truncatula* orthologs of detected  
305 outlier loci and key *M. truncatula* genes involved in the rhizobia symbiosis, assuming synteny  
306 between *M. lupulina* and *M. truncatula*. Details of these analyses can be found in the  
307 Supplemental Methods (Appendix 2).

308

## 309 **Results**

### 310 *Reciprocal inoculation experiment*

311 Uninoculated *Medicago lupulina* plants performed extremely poorly without rhizobia.  
312 None of our uninoculated control plants flowered or set seed, and the biomass of control plants  
313 was approximately 20-fold smaller than inoculated plants (least squares mean  $\pm$  SE (mg):  
314 controls:  $21.01 \pm 0.05$ ; inoculated plants from both rhizobia treatments:  $476.01 \pm 0.03$ ;  $F_{1,14.808} =$   
315  $610.7$ ,  $P < 0.001$ ). The performance of the control plants also demonstrates that cross-  
316 contamination between the two rhizobia treatments was likely minimal in our experiment. Only 1  
317 of 42 uninoculated control plants produced nodules, and this anomalous individual was similar in  
318 size to the rest of the controls for the first several months, indicating that it probably did not  
319 nodulate until late in the experiment.

320 In plants inoculated with *E. medicae* or *E. meliloti*, pairwise family mean correlations  
321 between all measured traits were generally low, indicating that the traits that we measured were  
322 largely independent of one another ( $r \leq |0.10|$ ,  $P \geq 0.54$ ). Only flowering time and aboveground  
323 biomass were significantly correlated ( $r = 0.49$ ,  $P = 0.002$ ); later-flowering plants had greater  
324 aboveground biomass.

325 Our analysis of seed number, probability of flowering, and flowering time revealed no  
326 evidence of adaptation to the local rhizobia. There was no significant rhizobia-by-region  
327 interaction for any of these reproductive traits (Figure 3, Table 1). There was a marginally  
328 significant effect of region on seed number; southern plants produced more seeds than northern  
329 plants in both rhizobia treatments (Figure 3A, Table 1). There was no significant effect of  
330 rhizobia treatment or region on either flowering trait (Figure 3C, Table 1).

331 The rhizobia-by-region interaction for aboveground biomass was marginally significant  
332 ( $P_{\text{rhizobia-by-region interaction}} = 0.054$ , Table 1). While the biomass of northern plants was unaffected by  
333 rhizobia treatment, southern plants produced more aboveground biomass when inoculated with  
334 *E. meliloti* (Figure 3B), the locally abundant rhizobia in south.

335 We found a highly significant rhizobia-by-region interaction for nodule number (Table  
336 1). Northern plants produced more nodules than southern plants when inoculated with *E.*  
337 *medicae*, the locally abundant rhizobia in the north. The difference between northern and  
338 southern plants decreased when inoculated with *E. meliloti*, an effect that was driven by both an  
339 increase in nodulation in southern plants and a decrease in nodulation in northern plants (Figure  
340 3D). There was also a significant effect of region, indicating that northern plants produced more  
341 nodules across both rhizobia treatments, and a significant effect of researcher (Table 1).



342 Aboveground biomass varied significantly among populations ( $\chi^2 = 3.405$ ,  $P = 0.033$ ) and  
343 families ( $\chi^2 = 40.490$ ,  $P < 0.001$ ). Number of nodules did not vary among populations ( $\chi^2 = 0$ ,  $P$   
344  $= 0.500$ ), but did vary among families ( $\chi^2 = 1305.200$ ,  $P < 0.001$ ). Flowering time varied  
345 significantly among populations ( $\chi^2 = 12.058$ ,  $P < 0.001$ ) and families ( $\chi^2 = 28.511$ ,  $P < 0.001$ ).  
346 Number of seeds did not vary significantly among populations ( $\Delta\text{DIC}_{\text{reduced}} = 1.54$ ), but did vary  
347 among families ( $\Delta\text{DIC}_{\text{reduced}} = 133.7$ ).

348

### 349 *Genomic outlier analysis*

350 We identified three outlier loci that appeared in the top 1% of SNPs in both the range-  
351 wide *M. lupulina* sample and southern *M. lupulina* Ontario sample in our Bayenv2 analysis  
352 (Supplemental Table S2 and S3). None of these three loci mapped to a specific gene in the *M.*  
353 *truncatula* reference genome. Furthermore, we did not find any genes involved in the legume-  
354 rhizobia interaction within 5 kb or 10 kb of our three outlier loci (Supplemental Table S4).  
355 Finally, the base pair distances between our outlier loci and known genes involved in the  
356 *Medicago-Ensifer* mutualism were very large (minimum: 18 kb) (Supplemental Table S4).  
357 Details on summary  $X^T X$  statistics, BLAST alignment scores, and gene functions are presented  
358 in the Supplemental Methods (Appendix 3) and Supplemental Table S2.

359

### 360 **Discussion**

361 We performed a reciprocal inoculation experiment and genome scan to test for symbiont  
362 local adaptation in the mutualism between *M. lupulina* and nitrogen-fixing *Ensifer* bacteria  
363 across its eastern North American range. We found no evidence that plants are adapted to the

364 locally abundant rhizobia species in either analysis. Local rhizobia did not have differential  
365 fitness consequences for their host plants, nor were any of the well-characterized symbiosis  
366 genes differentiated between field-collected plants associated with different rhizobia. However,  
367 we did find suggestive evidence for rhizobium local adaptation to the plant host; plants produced  
368 more nodules with rhizobia from the same geographic region. Overall, symbiont local adaptation  
369 appears to be absent or weak in this mutualism's eastern North American range despite the strong  
370 cline in the relative abundances of the two rhizobia species.

371

#### 372 *Reciprocal inoculation experiment & genomic outlier analysis*

373 Uninoculated plants performed extremely poorly without either *Ensifer* species,  
374 demonstrating that *M. lupulina* is adapted to symbiosis with rhizobia. Despite differential  
375 nodulation with local and foreign rhizobia ( $P_{\text{rhizobia-by-region}} < 0.001$ , Table 1), however, there was  
376 no strong evidence for adaptation to the local rhizobia in other plant traits. One explanation for  
377 this pattern is that plants modify their nodulation strategy to compensate for differences in  
378 symbiotic efficiency with local and foreign rhizobia. The congeneric species *M. truncatula*  
379 adjusts its nodulation strategy in response to the rhizobia nitrogen fixation efficiency (Heath &  
380 Tiffin 2009), which jointly depends on plant and rhizobia genotype (Mhadhbi *et al.*, 2005). If  
381 plants produce more nodules with less efficient symbionts, increased nodulation may not  
382 translate to greater nitrogen uptake, masking any effects of differential nodulation on biomass  
383 and seed production. The fact that seed number, a reasonable proxy for total fitness in a selfing  
384 annual or short-lived perennial like *M. lupulina* (Turkington & Cavers, 1979), was unaffected by

385 the local rhizobia strongly suggests that adaptation to the local rhizobia was absent in our  
386 experiment at the whole-plant level.

387 Our data suggest that symbiont local adaptation may be restricted to the rhizobia in this  
388 mutualism; the rhizobia may be adapted to their local *M. lupulina* genotype even though the  
389 plant does not appear to be adapted to its local rhizobium. The strongest signature of local  
390 adaptation in our reciprocal inoculation experiment occurred in nodule traits, a pattern that has  
391 also been documented in congeneric *Medicago* species (Porter *et al.*, 2011). Differential  
392 nodulation may impact the rhizobia more than the plant, given that nodule number is correlated  
393 with rhizobia fitness in *Medicago* (Heath, 2010).

394 However, even in the nodulation trait that exhibited a strong rhizobia-by-region  
395 interaction—the statistical signature of local adaptation—the data are only weakly consistent  
396 with the canonical pattern of local adaptation. The strongest test of local adaptation is whether  
397 local genotypes outperform foreign genotypes in all environments (the "local-versus-foreign"  
398 criterion) (Kawecki & Ebert, 2004). Neither trait that exhibited any rhizobia-by-region  
399 interaction (number of nodules and aboveground biomass) satisfied this criterion. Instead, our  
400 results were more closely aligned with a weaker test of local adaptation, which diagnoses local  
401 adaptation when each genotype's fitness is greater in its native environment than in alternative  
402 environments (the "home-versus-away" criterion) (Kawecki & Ebert, 2004).

403 Although reciprocal inoculation experiments are powerful because they reflect whole-  
404 organism performance in native and foreign environments, genotype-by-environment  
405 interactions are sensitive to experimental conditions (Kawecki & Ebert, 2004). We designed our  
406 experiment to minimize this concern by mimicking key abiotic conditions relevant to the

407 *Medicago*-rhizobia mutualism. For example, we planted in sand, which reflects the nitrogen-poor  
408 stony roadside soils that *M. lupulina* naturally colonizes (Turkington and Cavers 1979). Under  
409 such nitrogen-limited conditions, the mutualism between legumes and nitrogen-fixing bacteria is  
410 especially crucial for the plant (Heath et al. 2010). Nevertheless, the absence of local adaptation  
411 in our experiment could be due to experimental conditions not adequately reflecting the typical  
412 natural environment (in our case, cone-tainers, sterilized greenhouse soil, artificial day length  
413 control, absence of other biotic interactors, etc.). A second caveat of our reciprocal inoculation  
414 experiment is that we used only one strain for each rhizobium species. Although previous work  
415 suggests that functional diversity within *E. medicae* and *E. meliloti* is extremely limited in  
416 eastern North America, it is possible that we would have detected a signal of local adaptation had  
417 we used different or larger sample of rhizobia strains.

418 To address these caveats, we performed a genomic outlier analysis to search for allele  
419 frequency differences between plants associated with different rhizobia species. Genome scans  
420 circumvent the caveats described above because they integrate across many generations of  
421 selection and ancillary environmental variation. However, we also found very weak evidence of  
422 symbiont local adaptation in this analysis. The loci that were highly differentiated between plants  
423 hosting different *Ensifer* species (the top 1% of loci in the  $X^T X$  outlier analysis) were not  
424 associated with any genes involved in the legume-rhizobia symbiosis in either the range-wide or  
425 Ontario samples. Moreover, none of the *M. truncatula* orthologs of our outlier loci were located  
426 within the scale of linkage disequilibrium (5-10 kb in *M. truncatula*) (Branca et al., 2011) from  
427 known symbiosis genes. It is unlikely that the loci identified in our genome scan are novel *M.*  
428 *lupulina*-specific symbiosis genes underlying adaptation to the local bacteria. The *Medicago*

429 genes involved in symbiotic interactions with rhizobia are well characterized and highly  
430 conserved in legumes (Rostas *et al.*, 1986; van Rhijn & Vanderleyden, 1995; De Mita *et al.*,  
431 2006; Branca *et al.*, 2011; Gorton *et al.*, 2012; Stanton-Geddes *et al.*, 2013). *Medicago lupulina*  
432 is a close relative of *M. truncatula* (Bena, 2001; Yoder *et al.*, 2013), and both plants fix nitrogen  
433 with both *Ensifer* species tested in our experiment (Béna *et al.*, 2005). However, our results are  
434 subject to caveats common to genome scans for selection (Pavlidis *et al.*, 2012). In particular,  
435 our sample size in terms of individuals, and the number of SNPs, was low, reducing our power.  
436 Therefore, our genome scan might not have been able to detect highly differentiated loci  
437 important for symbiont local adaptation in *M. lupulina*.

438

#### 439 *Local adaptation in the legume-rhizobia symbiosis*

440 Our data suggest that symbiont local adaptation may be asymmetric in this mutualism.  
441 Although plant fitness was not affected by the identity of its rhizobial symbiont, plants tended to  
442 produce more nodules with rhizobia from the same geographic region. This pattern was  
443 especially pronounced for the northern rhizobium, *E. medicae*. Stronger symbiont local  
444 adaptation in one partner commonly occurs in host-parasite systems (Hoeksema & Forde, 2008),  
445 but the phenomenon has not been systematically explored in the context of mutualism even  
446 though asymmetrical evolutionary rates in coevolving species pairs are expected in both  
447 mutualisms and antagonisms (Bergstrom & Lachmann, 2003).

448 Nevertheless, our phenotypic and genomic data indicate that *M. lupulina* is not adapted to  
449 the local rhizobia across its eastern North American range. The absence of symbiont local  
450 adaptation in this mutualism is surprising given that the system is characterized by several

451 features that ordinarily strongly favor its evolution. Genotype-by-genotype interactions  
452 commonly occur between a congener, *M. truncatula*, and different strains of the same *Ensifer*  
453 species (Heath & Tiffin, 2007; Heath, 2010; Heath *et al.*, 2012), suggesting that the genetically  
454 divergent rhizobia species (Bailly *et al.*, 2006) we assayed would have even greater effects on  
455 their plant host. Furthermore, there is a cline in the frequencies of the two rhizobia across a large  
456 geographic scale that coincides with plant population genetic structure (Harrison *et al.*, 2017).  
457 What might account for the lack of symbiont local adaptation in this mutualism?

458         Gene flow may overwhelm the effects of local selection, leading to a low equilibrium  
459 level of genetic differentiation between plants associated with different rhizobia (McKay &  
460 Latta, 2002). Although there is a strong geographic cline in the frequencies of the two *Ensifer*  
461 species, Harrison *et al.* (2017) did detect *E. meliloti* in some northern populations and *E. medicae*  
462 in some southern populations. Symbiont local adaptation within *M. lupulina* populations could  
463 be swamped by gene flow from neighboring populations that encounter the alternative mutualist,  
464 or by the invasion of the alternative mutualist itself. Frequent gene flow across large geographic  
465 distances is consistent with the ecology of *M. lupulina* in North America. It is dispersed over  
466 long distances by birds, grazing animals, and water, and is likely distributed as a component in  
467 seed mixes for forage crops as well (Turkington and Cavers 1979).

468         Gene flow in the form of horizontal gene transfer between the two rhizobia species could  
469 similarly homogenize any signature of local selection (Lenormand, 2002; Bailly *et al.*, 2007).  
470 Bacteria that form nitrogen-fixing symbioses with legumes have been shown to horizontally  
471 transfer genes involved in forming and maintaining the mutualism (Suominen *et al.*, 2001; Aoki  
472 *et al.*, 2013; Lemaire *et al.*, 2015). Swapping cassettes of symbiosis genes would enable

473 genetically divergent rhizobial species to associate with the same hosts, largely eliminating  
474 among-symbiont differences from the perspective of the plant. Finally, temporal variation in the  
475 biotic and abiotic environment may modify the costs and benefits of the mutualism (Heath *et al.*,  
476 2010; Heath & McGhee, 2012; Simonsen & Stinchcombe, 2014a), weakening selection favoring  
477 local rhizobia.

478         Alternatively, symbiont local adaptation may generate relatively weak fitness tradeoffs in  
479 mutualisms. The fitness tradeoffs that are the hallmark of local adaptation evolve whenever  
480 adaptation to one environment results in maladaptation to another (Kawecki & Ebert, 2004). It  
481 has been hypothesized that selection in coevolving mutualisms strongly favors general  
482 compatibility and the reduction of fitness tradeoffs (Law & Koptur, 1986; Parker, 1999; Barrett  
483 *et al.*, 2012). Selection to minimize fitness tradeoffs may be especially strong in the legume-  
484 rhizobia mutualism, which is crucial for plants growing in nitrogen-poor soils (Heath *et al.*,  
485 2010). Under nitrogen-limited conditions, the cost of maladaptation to a locally rare rhizobium  
486 may be severe enough to outweigh the selective advantage of a marginal increase in the benefits  
487 obtained from the locally abundant rhizobium (Barrett *et al.*, 2012). However, this process  
488 should minimize plant-rhizobia interactions for fitness *within* rhizobia species as well,  
489 inconsistent with the pervasive genotype-by-genotype interactions documented between *M.*  
490 *truncatula* and *E. meliloti* (Heath *et al.*, 2012).

491

#### 492 *Complementarity of phenotypic and genotypic approaches*

493         In the present study, we took advantage of a pre-existing genomic dataset to complement  
494 and extend our test for symbiont local adaptation using a classic reciprocal inoculation

495 experiment. Our genomic outlier analysis also did not produce evidence of symbiont local  
496 adaptation, possibly because of our low sample size and low SNP coverage in our data set.  
497 However, we believe that combining an experimental approach and genomics is an innovative  
498 and powerful way to test for local adaptation that should be applied more broadly. Although  
499 genome scans and reciprocal inoculation experiments are typically treated as alternatives because  
500 they draw on fundamentally different data, together the two approaches constitute a rigorous test  
501 for local adaptation in environmentally sensitive symbioses such as the legume-rhizobia  
502 mutualism. Combined, the two approaches integrate over the effects of all loci in the genome  
503 (reciprocal inoculation experiments) and across ancillary environmental variation (genome  
504 scans), producing inferences that are less vulnerable to the weaknesses of either method (Buehler  
505 *et al.*, 2014; de Villemereuil *et al.*, 2015; Jensen *et al.*, 2016). Studies of (symbiont) local  
506 adaptation should consider pairing phenotypic and genomic approaches to validate their results  
507 with independent lines of evidence and exclude alternative interpretations of the data (de  
508 Villemereuil *et al.*, 2015; Jensen *et al.*, 2016). Future directions for our research could include  
509 repeating the genomic outlier test with a higher quality genomic data set to determine whether  
510 the reciprocal inoculation and genome scan produce concordant results on symbiont local  
511 adaptation.

512

### 513 **Acknowledgements**

514 Our work is supported by Discovery Grants and graduate fellowships from NSERC Canada, and  
515 the EEB Postdoctoral Fellowship at the University of Toronto. We thank Bruce Hall and Andrew  
516 Petrie for greenhouse assistance, and Adriana Salcedo, Michelle Afkhami, and Rebecca Batstone



517 for advice on experimental design and analysis. We are grateful for feedback from an  
518 anonymous Associate Editor and two anonymous reviewers, which strengthened the manuscript.  
519

520 **References**

- 521 Altman, N. & Krzywinski, M. 2015. Points of Significance: Split plot design. *Nat. Methods* **12**:  
522 165–166.
- 523 Anderson, B., Johnson, S.D. & Anderson, B. 2009. Geographical covariation and local  
524 convergence of flower depth in a guild of fly-pollinated plants. *New Phytol.* **182**: 533–540.
- 525 Ané, J.-M., Lévy, J., Thoquet, P., Kulikova, O., de Billy, F., Penmetsa, V., *et al.* 2002. Genetic  
526 and cytogenetic mapping of DMI1, DMI2, and DMI3 genes of *Medicago truncatula*  
527 involved in Nod factor transduction, nodulation, and mycorrhization. *Mol. Plant. Microbe.*  
528 *Interact.* **15**: 1108–1118.
- 529 Antonovics, J. 1976. The Nature of Limits to Natural Selection. *Ann. Missouri Bot. Gard.* **63**:  
530 224–247.
- 531 Aoki, S., Ito, M. & Iwasaki, W. 2013. From alpha- to beta-proteobacteria: The origin and  
532 evolution of rhizobial nodulation genes nodIJ. *Mol. Biol. Evol.* **30**: 2494–2508.
- 533 Bailly, X., Olivieri, I., Brunel, B., Cleyet-Marel, J.C. & Béna, G. 2007. Horizontal gene transfer  
534 and homologous recombination drive the evolution of the nitrogen-fixing symbionts of  
535 *Medicago* species. *J. Bacteriol.* **189**: 5223–5236.
- 536 Bailly, X., Olivieri, I., De Mita, S., Cleyet-Marel, J.C. & Béna, G. 2006. Recombination and  
537 selection shape the molecular diversity pattern of nitrogen-fixing *Sinorhizobium* sp.  
538 associated to *Medicago*. *Mol. Ecol.* **15**: 2719–2734.
- 539 Barrett, L.G., Broadhurst, L.M. & Thrall, P.H. 2012. Geographic adaptation in plant-soil  
540 mutualisms: Tests using *Acacia* spp. and rhizobial bacteria. *Funct. Ecol.* **26**: 457–468.
- 541 Bates, D., Mächler, M., Bolker, B. & Walker, S. 2015. Fitting Linear Mixed-Effects Models

- 542 using lme4. *J. Stat. Softw.* **67**.
- 543 Bena, G. 2001. Molecular phylogeny supports the morphologically based taxonomic transfer of  
544 the “medicagoid” *Trigonella* species to the genus *Medicago* L. *Plant Syst. Evol.* **229**: 217–  
545 236.
- 546 Béna, G., Lyet, A., Huguet, T. & Olivieri, I. 2005. *Medicago*-Sinorhizobium symbiotic  
547 specificity evolution and the geographic expansion of *Medicago*. *J. Evol. Biol.* **18**: 1547–  
548 1558.
- 549 Bergstrom, C.T. & Lachmann, M. 2003. The Red King effect: when the slowest runner wins the  
550 coevolutionary race. *Proc. Natl. Acad. Sci. U. S. A.* **100**: 593–598.
- 551 Bolker, B.M., Brooks, M.E., Clark, C.J., Geange, S.W., Poulsen, J.R., Stevens, M.H.H., *et al.*  
552 2009. Generalized linear mixed models: a practical guide for ecology and evolution. *Trends*  
553 *Ecol. Evol.* **24**: 127–35.
- 554 Bonhomme, M., Boitard, S., San Clemente, H., Dumas, B., Young, N. & Jacquet, C. 2015.  
555 Genomic Signature of Selective Sweeps Illuminates Adaptation of *Medicago truncatula* to  
556 Root-Associated Microorganisms. *Mol. Biol. Evol.* **32**: 2097–2110.
- 557 Branca, A., Paape, T.D., Zhou, P., Briskine, R., Farmer, A.D., Mudge, J., *et al.* 2011. Whole-  
558 genome nucleotide diversity, recombination, and linkage disequilibrium in the model  
559 legume *Medicago truncatula*. *Proc. Natl. Acad. Sci. U. S. A.* **108**: E864-70.
- 560 Bridle, J.R. & Vines, T.H. 2007. Limits to evolution at range margins: when and why does  
561 adaptation fail? *Trends Ecol. Evol.* **22**: 140–147.
- 562 Brockhurst, M.A. & Koskella, B. 2013. Experimental coevolution of species interactions. *Trends*  
563 *Ecol. Evol.* **28**: 367–375. Elsevier Ltd.

- 564 Brodie, E.D.J., Ridenhour, B.J. & Brodie, E.D.I. 2002. The evolutionary response of predators to  
565 dangerous prey: hotspots and coldspots in the geographic mosaic of coevolution between  
566 garter snakes and newts. *Evolution (N. Y.)* **56**: 2067–82.
- 567 Buehler, D., Holderegger, R., Brodbeck, S., Schnyder, E. & Gugerli, F. 2014. Validation of  
568 outlier loci through replication in independent data sets: A test on *Arabis alpina*. *Ecol. Evol.*  
569 **4**: 4296–4306.
- 570 Catchen, J., Hohenlohe, P.A., Bassham, S., Amores, A. & Cresko, W.A. 2013. Stacks: An  
571 analysis tool set for population genomics. *Mol. Ecol.* **22**: 3124–3140.
- 572 Catchen, J.M., Amores, A., Hohenlohe, P., Cresko, W., Postlethwait, J.H. & De Koning, D.-J.  
573 2011. Stacks: Building and Genotyping Loci De Novo From Short-Read Sequences. *G3* **1**:  
574 171–182.
- 575 Clausen, J. & Hiesey, W.M. 1958. Experimental studies on the nature of species. IV. Genetic  
576 structure of ecological races. *Carnegie Inst. Washingt.* **615**. Washington, DC.
- 577 Clausen, J., Keck, D.D. & Hiesey, W.M. 1940. Experimental studies on the nature of species. I.  
578 Effect of varied environments on North American plants. *Carnegie Inst. Washingt.* **520**.  
579 Washington, DC.
- 580 Cook, D.R. 1999. *Medicago truncatula* - A model in the making! *Curr. Opin. Plant Biol.* **2**: 301–  
581 304.
- 582 Cook, D.R., VandenBosch, K., de Bruijn, F.J. & Huguet, T. 1997. Model legumes get the nod.  
583 *Plant Cell* **9**: 275–280.
- 584 Coop, G., Witonsky, D., Di Rienzo, A. & Pritchard, J.K. 2010. Using environmental correlations  
585 to identify loci underlying local adaptation. *Genetics* **185**: 1411–1423.

- 586 De Mita, S., Santoni, S., Hochu, I., Ronfort, J. & Bataillon, T. 2006. Molecular evolution and  
587 positive selection of the symbiotic gene NORK in *Medicago truncatula*. *J. Mol. Evol.* **62**:  
588 234–244.
- 589 De Mita, S., Santoni, S., Ronfort, J. & Bataillon, T. 2007. Adaptive evolution of the symbiotic  
590 gene NORK is not correlated with shifts of rhizobial specificity in the genus *Medicago*.  
591 *BMC Evol. Biol.* **7**: 210.
- 592 de Villemereuil, P., Gaggiotti, O.E., Mouterde, M. & Till-Bottraud, I. 2015. Common garden  
593 experiments in the genomic era: new perspectives and opportunities. *Heredity (Edinb)*. **116**:  
594 249–254.
- 595 Ehinger, M., Mohr, T.J., Starcevich, J.B., Sachs, J.L., Porter, S.S. & Simms, E.L. 2014.  
596 Specialization-generalization trade-off in a Bradyrhizobium symbiosis with wild legume  
597 hosts. *BMC Ecol.* **14**: 8. BMC Ecology.
- 598 Elshire, R.J., Glaubitz, J.C., Sun, Q., Poland, J.A., Kawamoto, K., Buckler, E.S., *et al.* 2011. A  
599 robust, simple genotyping-by-sequencing (GBS) approach for high diversity species. *PLoS*  
600 *One* **6**: e19379.
- 601 Epstein, B., Branca, A., Mudge, J., Bharti, A.K., Briskine, R., Farmer, A.D., *et al.* 2012.  
602 Population Genomics of the Facultatively Mutualistic Bacteria *Sinorhizobium meliloti* and  
603 *S. medicae*. *PLoS Genet.* **8**: 1–10.
- 604 Fox, J. & Weisberg, S. 2011. *An R Companion to Applied Regression*, Second ed. Sage,  
605 Thousand Oaks, CA.
- 606 Gómez, J.M., Abdelaziz, M., Camacho, J.P.M., Muñoz-Pajares, A.J. & Perfectti, F. 2009. Local  
607 adaptation and maladaptation to pollinators in a generalist geographic mosaic. *Ecol. Lett.*

- 608       **12**: 672–682.
- 609   Gorton, A.J., Heath, K.D., Pilet-Nayel, M.-L., Baranger, A. & Stinchcombe, J.R. 2012. Mapping  
610       the genetic basis of symbiotic variation in legume-rhizobium interactions in *Medicago*  
611       *truncatula*. *G3* **2**: 1291–303.
- 612   Günther, T. & Coop, G. 2013. Robust identification of local adaptation from allele frequencies.  
613       *Genetics* **195**: 205–220.
- 614   Hadfield, J. 2015. MCMCglmm Course Notes.
- 615   Hadfield, J.D. 2010. MCMC methods for multi-response generalized linear mixed models: the  
616       MCMCglmm R package. *J. Stat. Softw.* **33**: 1–22.
- 617   Harrison, T.L., Wood, C.W., Heath, K.D. & Stinchcombe, J.R. 2017. Geographically structured  
618       genetic variation in the *Medicago lupulina*-*Ensifer* mutualism. *bioRxiv*, doi:  
619       <http://dx.doi.org/10.1101/117192>.
- 620   Heath, K.D. 2010. Intergenomic epistasis and coevolutionary constraint in plants and rhizobia.  
621       *Evolution (N. Y.)*. **64**: 1446–1458.
- 622   Heath, K.D., Burke, P. V & Stinchcombe, J.R. 2012. Coevolutionary genetic variation in the  
623       legume-rhizobium transcriptome. *Mol. Ecol.* **21**: 4735–47.
- 624   Heath, K.D. & McGhee, K.E. 2012. Coevolutionary Constraints? The environment alters  
625       tripartite interaction traits in a legume. *PLoS One* **7**: e41567.
- 626   Heath, K.D. & Nuismer, S.L. 2014. Connecting functional and statistical definitions of genotype  
627       by genotype interactions in coevolutionary studies. *Front. Genet.* **5**: 1–7.
- 628   Heath, K.D. & Stinchcombe, J.R. 2014. Explaining mutualism variation: a new evolutionary  
629       paradox? *Evolution (N. Y.)*. **68**: 309–317.

- 630 Heath, K.D., Stock, A.J. & Stinchcombe, J.R. 2010. Mutualism variation in the nodulation  
631 response to nitrate. *J. Evol. Biol.* **23**: 2494–2500.
- 632 Heath, K.D. & Tiffin, P. 2007. Context dependence in the coevolution of plant and rhizobial  
633 mutualists. *Proc. R. Soc. B Biol. Sci.* **274**: 1905–1912.
- 634 Hereford, J. 2009. A quantitative survey of local adaptation and fitness trade-offs. *Am. Nat.* **173**:  
635 579–588.
- 636 Hoeksema, J.D. & Forde, S.E. 2008. A Meta-Analysis of Factors Affecting Local Adaptation.  
637 *Am. Nat.* **171**: 275–290.
- 638 Hoeksema, J.D. & Thompson, J.N. 2007. Geographic structure in a widespread plant-  
639 mycorrhizal interaction: Pines and false truffles. *J. Evol. Biol.* **20**: 1148–1163.
- 640 Jensen, J.D., Foll, M. & Bernatchez, L. 2016. The past , present and future of genomic scans for  
641 selection. *Mol. Ecol.* **25**: 1–4.
- 642 Johnson, N.C., Wilson, G.W.T., Bowker, M.A., Wilson, J.A. & Miller, R.M. 2010. Resource  
643 limitation is a driver of local adaptation in mycorrhizal symbioses. *Proc. Natl. Acad. Sci. U.*  
644 *S. A.* **107**: 2093–8.
- 645 Jones, K.M., Kobayashi, H., Davies, B.W., Taga, M.E. & Walker, G.C. 2007. How rhizobial  
646 symbionts invade plants: the Sinorhizobium-Medicago model. *Nat. Rev. Microbiol.* **5**: 619–  
647 33.
- 648 Kawecki, T.J. & Ebert, D. 2004. Conceptual issues in local adaptation. *Ecol. Lett.* **7**: 1225–1241.
- 649 Koskella, B., Lin, D.M., Buckling, A. & Thompson, J.N. 2012. The costs of evolving resistance  
650 in heterogeneous parasite environments. *Proc. R. Soc. B* **279**: 1896–903.
- 651 Koski, M. & Ashman, T.-L. 2015. An altitudinal cline in UV floral pattern corresponds with a

- 652 behavioral change of a generalist pollinator assemblage. *Ecology* **96**: 3343–3353.
- 653 Law, R. & Koptur, S. 1986. On the evolution of non-specific mutualism. *Biol. J. Linn. Soc.* **27**:  
654 251–267.
- 655 Lemaire, B., Van Cauwenberghe, J., Chimphango, S., Stirton, C., Honnay, O., Smets, E., *et al.*  
656 2015. Recombination and horizontal transfer of nodulation and ACC deaminase (acdS)  
657 genes within Alpha- and Betaproteobacteria nodulating legumes of the Cape Fynbos biome.  
658 *FEMS Microbiol. Ecol.* **91**: 1–11.
- 659 Lenormand, T. 2002. Gene flow and the limits to natural selection. *Trends Ecol. Evol.* **17**: 183–  
660 189.
- 661 McKay, J.K. & Latta, R.G. 2002. Adaptive population divergence: Markers, QTL and traits.  
662 *Trends Ecol. Evol.* **17**: 285–291.
- 663 McKay Curtis, S. 2015. *mcmcplots: Create plots from MCMC output*. R package version 0.4.2.
- 664 McKenna, A., Hanna, M., Banks, E., Sivachenko, A., Cibulskis, K., Kernysky, A., *et al.* 2010.  
665 The genome analysis toolkit: A MapReduce framework for analyzing next-generation DNA  
666 sequencing data. *Genome Res.* **20**: 1297–1303.
- 667 Mhadhbi, H., Jebara, M., Limam, F., Huguet, T. & Aouani, M.E. 2005. Interaction between  
668 *Medicago truncatula* lines and *Sinorhizobium meliloti* strains for symbiotic efficiency and  
669 nodule antioxidant activities. *Physiol. Plant.* **124**: 4–11.
- 670 Mylona, P., Pawlowski, K. & Bisseling, T. 1995. Symbiotic Nitrogen Fixation. *Plant Cell* **7**:  
671 869–885.
- 672 Newman, E., Manning, J. & Anderson, B. 2015. Local adaptation: Mechanical fit between floral  
673 ecotypes of *Nerine humilis* (Amaryllidaceae) and pollinator communities. *Evolution (N. Y.)*.



- 674           **69**: 2262–2275.
- 675 Oldroyd, G.E.D. 2013. Speak, friend, and enter: signalling systems that promote beneficial  
676           symbiotic associations in plants. *Nat. Rev. Microbiol.* **11**: 252–63. Nature Publishing Group.
- 677 Oldroyd, G.E.D., Harrison, M.J. & Paszkowski, U. 2009. Reprogramming plant cells for  
678           endosymbiosis. *Science (80-. )*. **324**: 753–755.
- 679 Parker, M.A. 1999. Mutualism in metapopulations of legumes and rhizobia. *Am. Nat.* **153**: S48–  
680           S60.
- 681 Pavlidis, P., Jensen, J.D., Stephan, W. & Stamatakis, A. 2012. A critical assessment of  
682           storytelling: Gene ontology categories and the importance of validating genomic scans.  
683           *Mol. Biol. Evol.* **29**: 3237–3248.
- 684 Plummer, M., Best, N., Cowles, K. & Vines, K. 2006. CODA: Convergence Diagnostics and  
685           Output Analysis for MCMC. *R News* **6**: 7–11.
- 686 Porter, S.S., Stanton, M.L. & Rice, K.J. 2011. Mutualism and adaptive divergence: Co-invasion  
687           of a heterogeneous grassland by an exotic legume-rhizobium symbiosis. *PLoS One* **6**.
- 688 R Core Team. 2016. R: A language and environment for statistical computing. Vienna, Austria.
- 689 Rome, S., Cleyet-Marel, J.-C., Materon, L.A., Normand, P. & Brunel, B. 1997. Rapid  
690           identification of Medicago nodulating strains by using two oligonucleotide probes  
691           complementary to 16S rDNA sequences. *Can. J. Microbiol.* **43**: 854–861.
- 692 Rostas, K., Kondorosi, E., Horvath, B., Simoncsits, a & Kondorosi, a. 1986. Conservation of  
693           extended promoter regions of nodulation genes in Rhizobium. *Proc. Natl. Acad. Sci. U. S.*  
694           *A.* **83**: 1757–1761.
- 695 Savolainen, O., Lascoux, M. & Merilä, J. 2013. Ecological genomics of local adaptation. *Nat.*

- 696 *Rev. Genet.* **14**: 807–20.
- 697 Simonsen, A.K. & Stinchcombe, J.R. 2014a. Herbivory eliminates fitness costs of mutualism  
698 exploiters. *New Phytol.* **202**: 651–61.
- 699 Simonsen, A.K. & Stinchcombe, J.R. 2014b. Standing genetic variation in host preference for  
700 mutualist microbial symbionts. *Proc. R. Soc. B Biol. Sci.* **281**: 20142036–20142036.
- 701 Spiegelhalter, D.J., Best, N.G., Carlin, B.P. & Van Der Linde, A. 2002. Bayesian measures of  
702 model complexity and fit. *J. R. Stat. Soc. Ser. B (Statistical Methodol.* **64**: 583–639.
- 703 Stanton-Geddes, J., Paape, T., Epstein, B., Briskine, R., Yoder, J., Mudge, J., *et al.* 2013.  
704 Candidate Genes and Genetic Architecture of Symbiotic and Agronomic Traits Revealed by  
705 Whole-Genome, Sequence-Based Association Genetics in *Medicago truncatula*. *PLoS One*  
706 **8**: 1–9.
- 707 Suominen, L., Roos, C., Lortet, G., Paulin, L. & Lindström, K. 2001. Identification and structure  
708 of the *Rhizobium galegae* common nodulation genes: evidence for horizontal gene transfer.  
709 *Mol. Biol. Evol.* **18**: 907–916.
- 710 Tang, H., Krishnakumar, V., Bidwell, S., Rosen, B., Chan, A., Zhou, S., *et al.* 2014. An  
711 improved genome release (version Mt4.0) for the model legume *Medicago truncatula*. *BMC*  
712 *Genomics* **15**: 312.
- 713 Tiffin, P. & Ross-Ibarra, J. 2014. Advances and limits of using population genetics to understand  
714 local adaptation. *Trends Ecol. Evol.* **29**: 673–680. Elsevier Ltd.
- 715 Turkington, R. & Cavers, P.B. 1979. The biology of Canadian weeds. 33. *Medicago lupulina* L.  
716 *Can. J. Plant Sci.* **59**: 99–110.
- 717 van Rhijn, P. & Vanderleyden, J. 1995. The *Rhizobium*-Plant Symbiosis. *Microbiol. Rev.* **59**:

- 718           124–142.
- 719   Whitlock, M.C. 2015. Modern Approaches to Local Adaptation. *Am. Nat.* **186**: S000–S000.
- 720   Yan, J., Chu, H.J., Wang, H.C., Li, J.Q. & Sang, T. 2009. Population genetic structure of two  
721           Medicago species shaped by distinct life form, mating system and seed dispersal. *Ann. Bot.*  
722           **103**: 825–834.
- 723   Yoder, J.B., Briskine, R., Mudge, J., Farmer, A., Paape, T., Steele, K., *et al.* 2013. Phylogenetic  
724           signal variation in the genomes of medicago (Fabaceae). *Syst. Biol.* **62**: 424–438.
- 725   Young, J.M. 2010. Sinorhizobium versus Ensifer: May a taxonomy subcommittee of the ICSP  
726           contradict the Judicial Commission? *Int. J. Syst. Evol. Microbiol.* **60**: 1711–1713.
- 727   Young, N.D., Debellé, F., Oldroyd, G.E.D., Geurts, R., Cannon, S.B., Udvardi, M.K., *et al.*  
728           2011. The Medicago genome provides insight into the evolution of rhizobial symbioses.  
729           *Nature* **480**: 520–4.
- 730   Zuur, A.F., Ieno, E.N., Walker, N.J., Saveliev, A.A. & Smith, G.M. 2009. *Mixed Effects Models*  
731           *and Extensions in Ecology with R*. Springer, New York, NY.
- 732

733 **Data accessibility**

734 Sequence data will be uploaded to NCBI. VCF files and data from the reciprocal inoculation  
735 experiment will be available on Dryad. GPS coordinates of sampled plant and rhizobia  
736 populations are reported in Table S1.

737 **Tables and Figures**

738 Table 1. Results of general(ized) linear mixed models testing for local adaptation in the  
739 reciprocal inoculation experiment.

|                    |                   | pMCMC         |            |       |
|--------------------|-------------------|---------------|------------|-------|
| Seeds              | Rhizobia          |               |            | 0.204 |
| <i>(MCMC GLMM)</i> | Region            |               |            | 0.070 |
|                    | Rhizobia × region |               |            | 0.350 |
|                    |                   |               |            |       |
|                    |                   | F             | df         | P     |
| Biomass            | Rhizobia          | 1.955         | 1, 5.097   | 0.220 |
| <i>(LMM)</i>       | Region            | 0.131         | 1, 12.782  | 0.723 |
|                    | Rhizobia × region | 3.747         | 1, 248.656 | 0.054 |
|                    |                   |               |            |       |
|                    |                   | F             | df         | P     |
| Flowering time     | Rhizobia          | 0.016         | 1, 5.436   | 0.903 |
| <i>(LMM)</i>       | Region            | 0.252         | 1, 12.896  | 0.624 |
|                    | Rhizobia × region | 1.378         | 1, 164.795 | 0.242 |
|                    |                   |               |            |       |
|                    |                   | Wald $\chi^2$ | df         | P     |
| Prob. of flowering | Rhizobia          | 0.012         | 1          | 0.912 |
| <i>(GLMM)</i>      | Region            | 0.047         | 1          | 0.829 |
|                    | Rhizobia × region | 0.231         | 1          | 0.631 |

---

|         |                          | Wald $\chi^2$ | df       | P                |
|---------|--------------------------|---------------|----------|------------------|
| Nodules | Rhizobia                 | 0.107         | 1        | 0.743            |
| (GLMM)  | <b>Region</b>            | <b>5.581</b>  | <b>1</b> | <b>0.018</b>     |
|         | <b>Researcher</b>        | <b>95.079</b> | <b>1</b> | <b>&lt;0.001</b> |
|         | <b>Rhizobia × region</b> | <b>34.806</b> | <b>1</b> | <b>&lt;0.001</b> |

---

740

741 The type of model used is indicated below each trait. GLMM: generalized linear mixed model

742 (see text for error distribution). LMM: Linear mixed model (Gaussian error).

743

744 **Figure Legends**

745 Figure 1. A *Medicago lupulina* individual flowering in the greenhouse.

746

747 Figure 2. Locations of the 14 *M. lupulina* populations used in this study. The size of each circle  
748 corresponds to the number of plants sampled from the population, and the color indicates the  
749 rhizobia. The *E. medicae* strain used in the reciprocal inoculation experiment was obtained from  
750 the northernmost population sampled ("SEG"); the *E. meliloti* strain was obtained from the  
751 southernmost population ("DE"). See Table S1 for GPS coordinates.

752

753 Figure 3. Least squares means and 95% confidence intervals for northern (black) and southern  
754 (white) plants grown in the two rhizobia treatments. *Ensifer medicae* is the locally abundant  
755 rhizobia in the north, and *E. meliloti* is the locally abundant rhizobia in the south. (A) Number of  
756 seeds; (B) aboveground biomass; (C) flowering time; (D) number of nodules.

757

758 **Supplementary Methods**

759 **Appendix 1**

760 *Bioinformatics and SNP discovery in Ensifer*

761 We aligned forward and reverse rhizobia reads to the reference genome of *E. meliloti*  
762 strain 1021 (Galibert *et al.*, 2001) (NCBI references chromosome AIL591688, plasmid a  
763 AE006469, plasmid b AL591985) and the *E. medicae* strain WSM419 (Reeve *et al.*, 2010)  
764 (NCBI references chromosome 150026743 plasmid b 150030273, plasmid a 150031715,  
765 accessory plasmid 150032810) using BWA (Li and Durbin, 2009) and Stampy (Lunter and  
766 Goodson, 2011) with default parameters and the bamkeepgoodreads parameter. We assigned  
767 bacterial species using a combination of the percentage of reads mapping to one reference  
768 genome, and sequences at the 16S rDNA locus (NCBI gene references 1234653 and 5324158,  
769 respectively), which differs between *E. medicae* and *E. meliloti* (Rome *et al.*, 1997). We used  
770 Integrative Genomics Viewer to visualize and check alignment quality (Robinson *et al.*, 2011).  
771 In general, 69.99 – 94.02% (median 84.71%) of reads per sample mapped to the *E. meliloti*  
772 reference genome, and 69.32 – 92.48% (median 83.49%) mapped to the *E. medicae* genome.

773 We used PICARD tools to format, sort, and remove duplicates in sequence alignments.  
774 We applied GATK version 3 indel realignment and GATK Unified Genotyper SNP discovery on  
775 all bacteria alignments (McKenna *et al.*, 2010) with ploidy set to haploid. We used the Select  
776 Variants parameter in GATK to select SNP variants only. We used standard hard filtering  
777 parameters and variant quality score recalibration on SNP discovery according to GATK Best  
778 Practices (DePristo *et al.*, 2011; Van der Auwera *et al.*, 2013). We filtered rhizobia SNPs for a  
779 minimum read depth (DP) of 20, a maximum DP of 226 for *E. meliloti* (230 for *E. medicae*), and



780 a genotype quality (GP) of 30 using vcftools (Danecek *et al.*, 2011). We removed indels and sites  
781 with more than 10% of missing data from both *E. meliloti* and *E. medicae* data files. We  
782 identified synonymous SNPs using SnpEff (Cingolani, Platts, *et al.*, 2012b) and SnpSift  
783 (Cingolani, Patel, *et al.*, 2012a), using reference files GCA\_000017145.1.22 and  
784 GCA\_000006965.1.22 (for *E. medicae* and *E. meliloti*, respectively) in the pre-built database.  
785 We used the ANN annotation parameter in SnpSift to identify SNPs as synonymous variants and  
786 missense variants.

787

## 788 *Bioinformatics and SNP discovery in Medicago*

789 We called *Medicago* SNPs in GBS samples by following the three-stage pipeline in the  
790 program Stacks (Catchen *et al.*, 2011; 2013): cleaning raw data, building loci, and identifying  
791 SNPs. We trimmed reads to 64 bp and filtered reads by a phred score of 33, the default value for  
792 GSB reads sequenced on Illumina 2000/2500 machine. We built loci for *M. lupulina* using the *de*  
793 *novo* approach in Stacks (denovo\_map command), setting the -m parameter at 5, the -M  
794 parameter at 1, and the -n parameter at 1. In the final stage of the pipeline, we identified SNPs  
795 under the populations command by setting the -m parameter at 5. We filtered SNPs by removing  
796 indels, removing sites with more than 10% of missing data, and removing sites that were less  
797 than 64 bps apart with vcftools (Danecek *et al.*, 2011). We also excluded 9 SNPs with  
798 heterozygosity that was higher than expected under Hardy-Weinberg.

799

## 800 **Appendix 2**

### 801 *Genomic outlier tests*

802 We first performed the BLAST test in two ways: first using the range-wide sample of  
803 plants that hosted different bacterial species (73 plant individuals), and second, focusing on  
804 southern Ontario samples (49 plant individuals). We performed the latter test because of the  
805 possibility that many loci unrelated to bacterial specificity (e.g., climatic adaptation) could be  
806 differentiated between southern Ontario and the mid-Atlantic United States due to environmental  
807 gradients that covary with bacterial species composition.

808 Outlier loci detected in genotyping-by-sequencing (GBS) data are rarely the actual loci  
809 responsible for adaptation; instead, they are usually in linkage disequilibrium (LD) with the  
810 causal genes. To account for this possibility, we then searched for genes involved in the legume-  
811 rhizobia symbiosis within either 5 or 10 kb of the *M. truncatula* orthologs of the outlier loci that  
812 we detected in both the range-wide and Ontario samples. This approach assumes synteny  
813 between *M. truncatula* and *M. lupulina*. We chose 5 and 10 kb based on the scale of LD in *M.*  
814 *truncatula* (Branca *et al.*, 2011). While the scale of LD between even closely related species is  
815 likely to differ based on mutation rates, recombination, population structure, and a host of other  
816 demographic and evolutionary factors, we viewed this approach as superior to simply confining  
817 our searches to the GBS loci without accounting for their potential LD with causal genes.

818 Finally, we measured the distance between the *M. truncatula* orthologs of the outlier loci  
819 that we detected in both the range-wide and Ontario samples and key *M. truncatula* genes  
820 involved in the rhizobia symbiosis (again assuming synteny between *M. truncatula* and *M.*  
821 *lupulina*). We considered genes involved in the initial signal exchange between the legume and  
822 rhizobia (NSP, IPD3, and DMI1-DMI3); genes involved in infection thread development (LIN);

823 and genes involved in both rhizobia signaling and infection (NFP, LYK3, and NIN) (Jones *et al.*,  
824 2007; Oldroyd *et al.*, 2009; Young *et al.*, 2011; Oldroyd, 2013; Tang *et al.*, 2014).

825

### 826 **Appendix 3**

#### 827 *Genomic outlier results*

828 We identified a distribution of  $X^T X$  statistics around the null expectation of  $X^T X = 2$ ,  
829 reflecting the 2 populations assigned in Bayenv2 (*M. lupulina* plants hosting *E. medicae* and  
830 plants hosting *E. meliloti*). In the range-wide sample, 16% (354 of 2209) of SNPs had  $X^T X$   
831 scores greater than the null expectation of 2; in the Ontario sample, 29% (573 of 1977) of SNPs  
832 had  $X^T X$  scores greater than 2. We detected a range of alignment scores when we used BLAST  
833 to align outlier loci with top  $X^T X$  statistics from the whole sample and the Ontario sample to the  
834 *M. truncatula* reference genome (Table 2). The loci mapped to several different chromosomes in  
835 the *M. truncatula* reference genome.

836 Of the top 1% of SNPs detected in the range-wide sample (20 SNPs total), eight were  
837 associated with a specific *M. truncatula* gene (BLAST scores: 35.6 – 102; E value: 1.00e-19 –  
838 0.31). Higher BLAST scores reflect higher-quality alignments; these scores indicate that our  
839 sequences generally aligned moderately well to the *M. truncatula* genome. E (expectation)-  
840 values reflect the number of hits expected by chance, so lower E-values indicate better matches.  
841 These 8 loci did not map to any genes known to be involved in the legume-rhizobia mutualism.  
842 The remaining 12 loci did not map to a specific gene in the *M. truncatula* genome (BLAST  
843 scores: 35.6 – 102; E-values: 3.00e-20 – 3.10e-1).

844           The results were qualitatively similar for the Ontario sample (Table 2). The BLAST  
845 scores of the top 1% of outlier SNPs (20 SNPs total) ranged from 37.4 to 111 (E-values: 5.00e-  
846 24 – 8.90e-2). Twelve of the top 1% of SNPs in the Ontario sample mapped to genes that are not  
847 known to be involved in the legume-rhizobia mutualism. The remaining eight loci did not  
848 associate with a specific gene in the *M. truncatula* annotated genome. The BLAST scores for  
849 these loci were similar to the twelve loci that did map to specific *M. truncatula* genes (score:  
850 35.6 – 95.1; E-value: 3.00e-20 – 3.10e-1).

851           There were only three outlier loci that appeared in the top 1% of SNPs in both the range-  
852 wide sample and the Ontario sample (Table 3). These loci mapped to chromosomes 1, 5, and 7 in  
853 the *M. truncatula* genome, but did not map to a specific gene. No genes found within 5 or 10kb  
854 of the *M. truncatula* orthologs of these three outliers are known to be involved in the legume-  
855 rhizobia symbiosis (assuming synteny between *M. truncatula* and *M. lupulina*). The *M.*  
856 *truncatula* ortholog of the outlier on chromosome 5 had two genes within 5 kb, a phosphate  
857 putative gene and a Ty3/Gypsy polyprotein/retrotransposon. The ortholog of the outlier on  
858 chromosome 1 had no genes within a 5 kb window, and the ortholog of the outlier on  
859 chromosome 7 had two genes within 5 kb, a DUF247 domain protein and a Gypsy-  
860 likepolyprotein/retrotransposon putative gene. When we increased our window size to 10 kb we  
861 found more genes, but none related to infection with rhizobia. For example, the *M. truncatula*  
862 ortholog of the outlier on chromosome 5 was close to a DUF679 domain membrane protein and  
863 an alpha/beta fold hydrolase putative gene. The ortholog of the outlier on chromosome 1 had a  
864 reverse transcriptase zinc binding protein and a homeobox knotted-like protein in its 10 kb

865 window. The ortholog of the outlier on chromosome 7 had a phosphoenolpyruvate carboxylase  
866 within its 10 kb window, along with several putative proteins.

867 Finally, we calculated the distance in base pairs between the *M. truncatula* orthologs of  
868 the three outlier loci found in both the range-wide and Ontario analyses and several genes  
869 involved in *Medicago*-rhizobia association. None of the symbiosis genes that we considered  
870 were close to the orthologs of any of these three outliers. Most of the symbiosis genes are located  
871 on chromosome 5, but none were close to the ortholog of the outlier locus on chromosome 5  
872 (Table 4). The ortholog of the outlier locus on chromosome 1 was approximately 35,822 kb  
873 away from the only symbiosis gene we considered that is located on chromosome 1 (LIN). The  
874 remaining two symbiosis genes—DMI1 and DMI2—are located on chromosomes 2 and 8 (Ané  
875 *et al.*, 2002), neither of which contained any outlier loci in our analysis.

876

877

878 **Supplemental Tables and Figures**

879

880 Table S1. Locations of *M. lupulina* and *Ensifer* populations used in population genetic analysis.

881

| Population ID | Province/State | Country       | Latitude  | Longitude  |
|---------------|----------------|---------------|-----------|------------|
| AV            | Pennsylvania   | United States | 40.200904 | -76.763663 |
| BR            | Ontario        | Canada        | 43.749940 | -79.639721 |
| COB           | Ontario        | Canada        | 44.103365 | -78.156738 |
| DE            | Delaware       | United States | 38.686381 | -75.07443  |
| HO            | Ontario        | Canada        | 44.219923 | -81.049833 |
| KA            | Ontario        | Canada        | 44.555739 | -78.838577 |
| MAP           | Ontario        | Canada        | 43.836307 | -80.636623 |
| PA1           | Pennsylvania   | United States | 39.930768 | -75.584929 |
| PAR           | New York       | United States | 40.659773 | -76.918652 |
| PT            | Pennsylvania   | United States | 40.07175  | -75.435691 |
| SEG           | Ontario        | Canada        | 45.225519 | -79.682214 |
| SIN           | Pennsylvania   | United States | 41.457507 | -77.135632 |
| UBR           | Delaware       | United States | 39.626937 | -75.675749 |
| WA            | Ontario        | Canada        | 43.596353 | -80.625336 |

882

883

884

885

886 Table S2. Summary statistics of Bayenv2 and BLAST results for the top 1% of SNPs in the  $X^T X$   
 887 outlier analysis.  
 888

| <b>Ontario sample</b>    |              |           |             |           |                                                  |
|--------------------------|--------------|-----------|-------------|-----------|--------------------------------------------------|
| $X^T X$                  | SNP identity | BLAST     | Query cover | E value   | Gene                                             |
| 4.20                     | 585117       | 37.4      | 56          | 0.089     | transmembrane protein                            |
| 3.83                     | 1192907      | 93.3      | 100         | 1.00E-18  | indole-3-glycerol phosphate lyase IGL1           |
| 3.82                     | 187811       | 93.3      | 98          | 1.00E-18  | toprim domain protein                            |
| 3.75                     | 1110167      | 107       | 100         | 6.00E-23  | TLD-domain nuclear protein                       |
| 3.73                     | 1610082      | 71.6      | 81          | 4.00E-12  | no result                                        |
| 3.65                     | 229813       | 35.6      | 60          | 3.10E-01  | no result                                        |
| 3.59                     | 1959186      | 107       | 100         | 6.00E-23  | TPR repeat protein                               |
| 3.56                     | 129152       | 41        | 59          | 7.00E-03  | no result                                        |
| 3.55                     | 884266       | 89.7      | 100         | 2.00E-17  | no result                                        |
| 3.44                     | 616912       | 95.1      | 98          | 4.00E-19  | no result                                        |
| 3.43                     | 97240        | 111       | 100         | 5.00E-24  | transportin-1 protein                            |
| 3.39                     | 666854       | 87.8      | 100         | 6.00E-17  | no result                                        |
| 3.39                     | 713735       | 96.9      | 100         | 1.00E-19  | indole-3-glycerol phosphate lyase IGL1           |
| 3.33                     | 1294820      | 69.8      | 95          | 2.00E-11  | copia-like polyprotein/retrotransposon           |
| 3.33                     | 686219       | 69.8      | 100         | 2.00E-11  | no result                                        |
| 3.33                     | 1463455      | 91.5      | 100         | 5.00E-18  | single-stranded nucleic acid-binding protein R3H |
| 3.29                     | 671122       | 37.4      | 85          | 8.90E-02  | cysteinyl-tRNA synthetase                        |
| 3.26                     | 1071597      | 98.7      | 100         | 3.00E-20  | no result                                        |
| 3.25                     | 109965       | no result | no result   | no result | no result                                        |
| 3.25                     | 734196       | 78.8      | 100         | 3.00E-14  | no result                                        |
| <b>Range-wide sample</b> |              |           |             |           |                                                  |
| 3.25                     | 825707       | 96.9      | 100         | 1.00E-19  | FAD/NAD(P)-binding oxidoreductase family protein |
| 3.06                     | 1131532      | 89.7      | 100         | 2.00E-17  | novel plant SNARE-like protein                   |
| 3.02                     | 1482582      | 35.6      | 39          | 0.31      | ASCH domain protein                              |
| 2.99                     | 405789       | 89.7      | 93          | 2.00E-17  | CAAX amino terminal protease family protein      |
| 2.99                     | 511074       | 48.2      | 96          | 5.00E-05  | no result                                        |
| 2.97                     | 175058       | 55.4      | 96          | 3.00E-07  | no result                                        |
| 2.95                     | 485278       | 91.5      | 93          | 5.00E-18  | no result                                        |
| 2.94                     | 254373       | 59        | 100         | 3.00E-08  | CRS1/YhbY (CRM) domain protein                   |
| 2.92                     | 1090953      | 55.4      | 95          | 3.00E-07  | galactose oxidase                                |
| 2.90                     | 921907       | 93.3      | 100         | 1.00E-18  | DUF223 domain protein                            |
| 2.86                     | 1071597      | 98.7      | 100         | 3.00E-20  | no result                                        |
| 2.82                     | 870953       | 35.6      | 51          | 3.10E-01  |                                                  |
| 2.81                     | 1590352      | 102       | 92          | 3.00E-21  | no result                                        |
| 2.75                     | 686219       | 69.8      | 100         | 2.00E-11  | no result                                        |
| 2.73                     | 774291       | 69.8      | 95          | 2.00E-11  | no result                                        |
| 2.71                     | 313573       | 69.8      | 98          | 2.00E-11  | no result                                        |
| 2.68                     | 1342844      | 60.8      | 90          | 8.00E-09  |                                                  |
| 2.67                     | 1217147      | 89.7      | 100         | 2.00E-17  | novel plant SNARE-like protein                   |

|      |         |      |     |          |           |
|------|---------|------|-----|----------|-----------|
| 2.64 | 616912  | 84.2 | 100 | 7.00E-16 | no result |
| 2.64 | 1057909 | 66.2 | 70  | 2.00E-10 | no result |

---

889



890 Table S3. Outlier loci found in the top 1% of Bayenv2 results in both the *M. lupulina* range-wide  
891 and Ontario samples.

892

| <b>X<sup>T</sup>X</b> | <b>SNP identity</b> | <b>BLAST</b> | <b>Query cover</b> | <b>E value</b> | <b>Gene name</b> |
|-----------------------|---------------------|--------------|--------------------|----------------|------------------|
| 3.26                  | 1071597             | 98.7         | 100                | 3.00E-20       | no result        |
| 3.44                  | 616912              | 95.1         | 98                 | 4.00E-19       | no result        |
| 3.33                  | 686219              | 69.8         | 100                | 2.00E-11       | no result        |

893

894

895

896

897 Table S4. Base pair distances between the *M. truncatula* ortholog of the outlier locus on  
898 chromosome 5 and well-characterized nodulation and rhizobial infection genes in *M. truncatula*.

899

| <b>Gene name</b>                              | <b>Distance (kb)</b> |
|-----------------------------------------------|----------------------|
| NFP (Nod-factor receptor 5)                   | 12397                |
| NSP (Nodulation receptor kinase-like protein) | 6319                 |
| LYK3 (LysM receptor kinase K1B)               | 18                   |
| NIN (Nodule inception protein)                | 24                   |
| IPD3 (Cyclops protein putative)               | 8469                 |

900

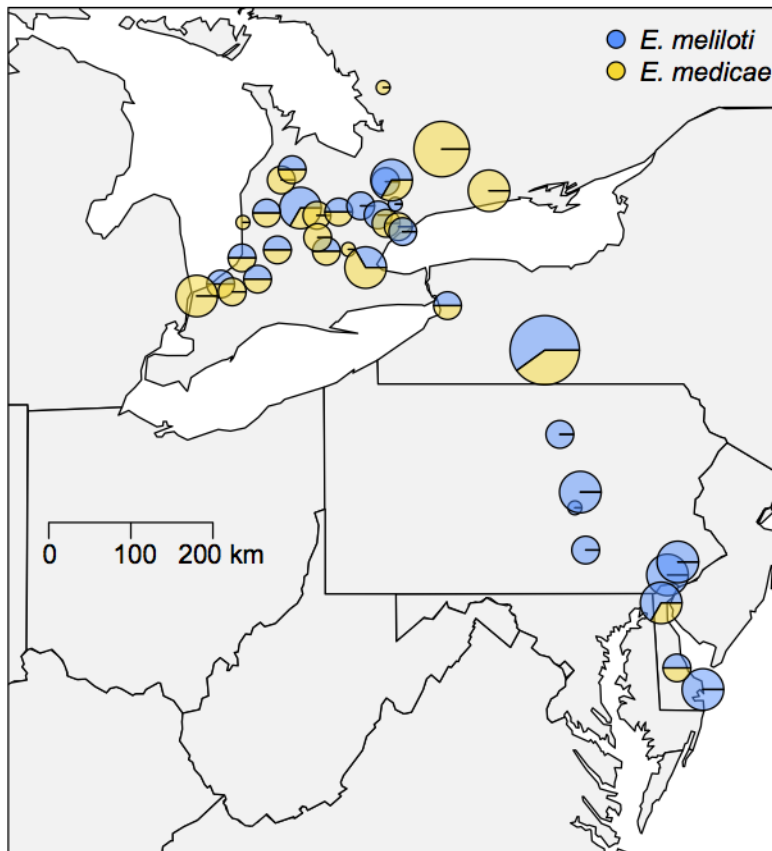

901  
902 Figure S1. Locations and bacterial species present in all 39 sampled *M. lupulina* populations.  
903 The size of each circle corresponds to the number of sampled plant individuals for which their  
904 bacterial partner was identified to species. The colors correspond to the fraction of plants  
905 partnered with *E. meliloti* (blue) and *E. medicae* (yellow). The map is modified from Figure 2 in  
906 Harrison et al. (2017).  
907  
908

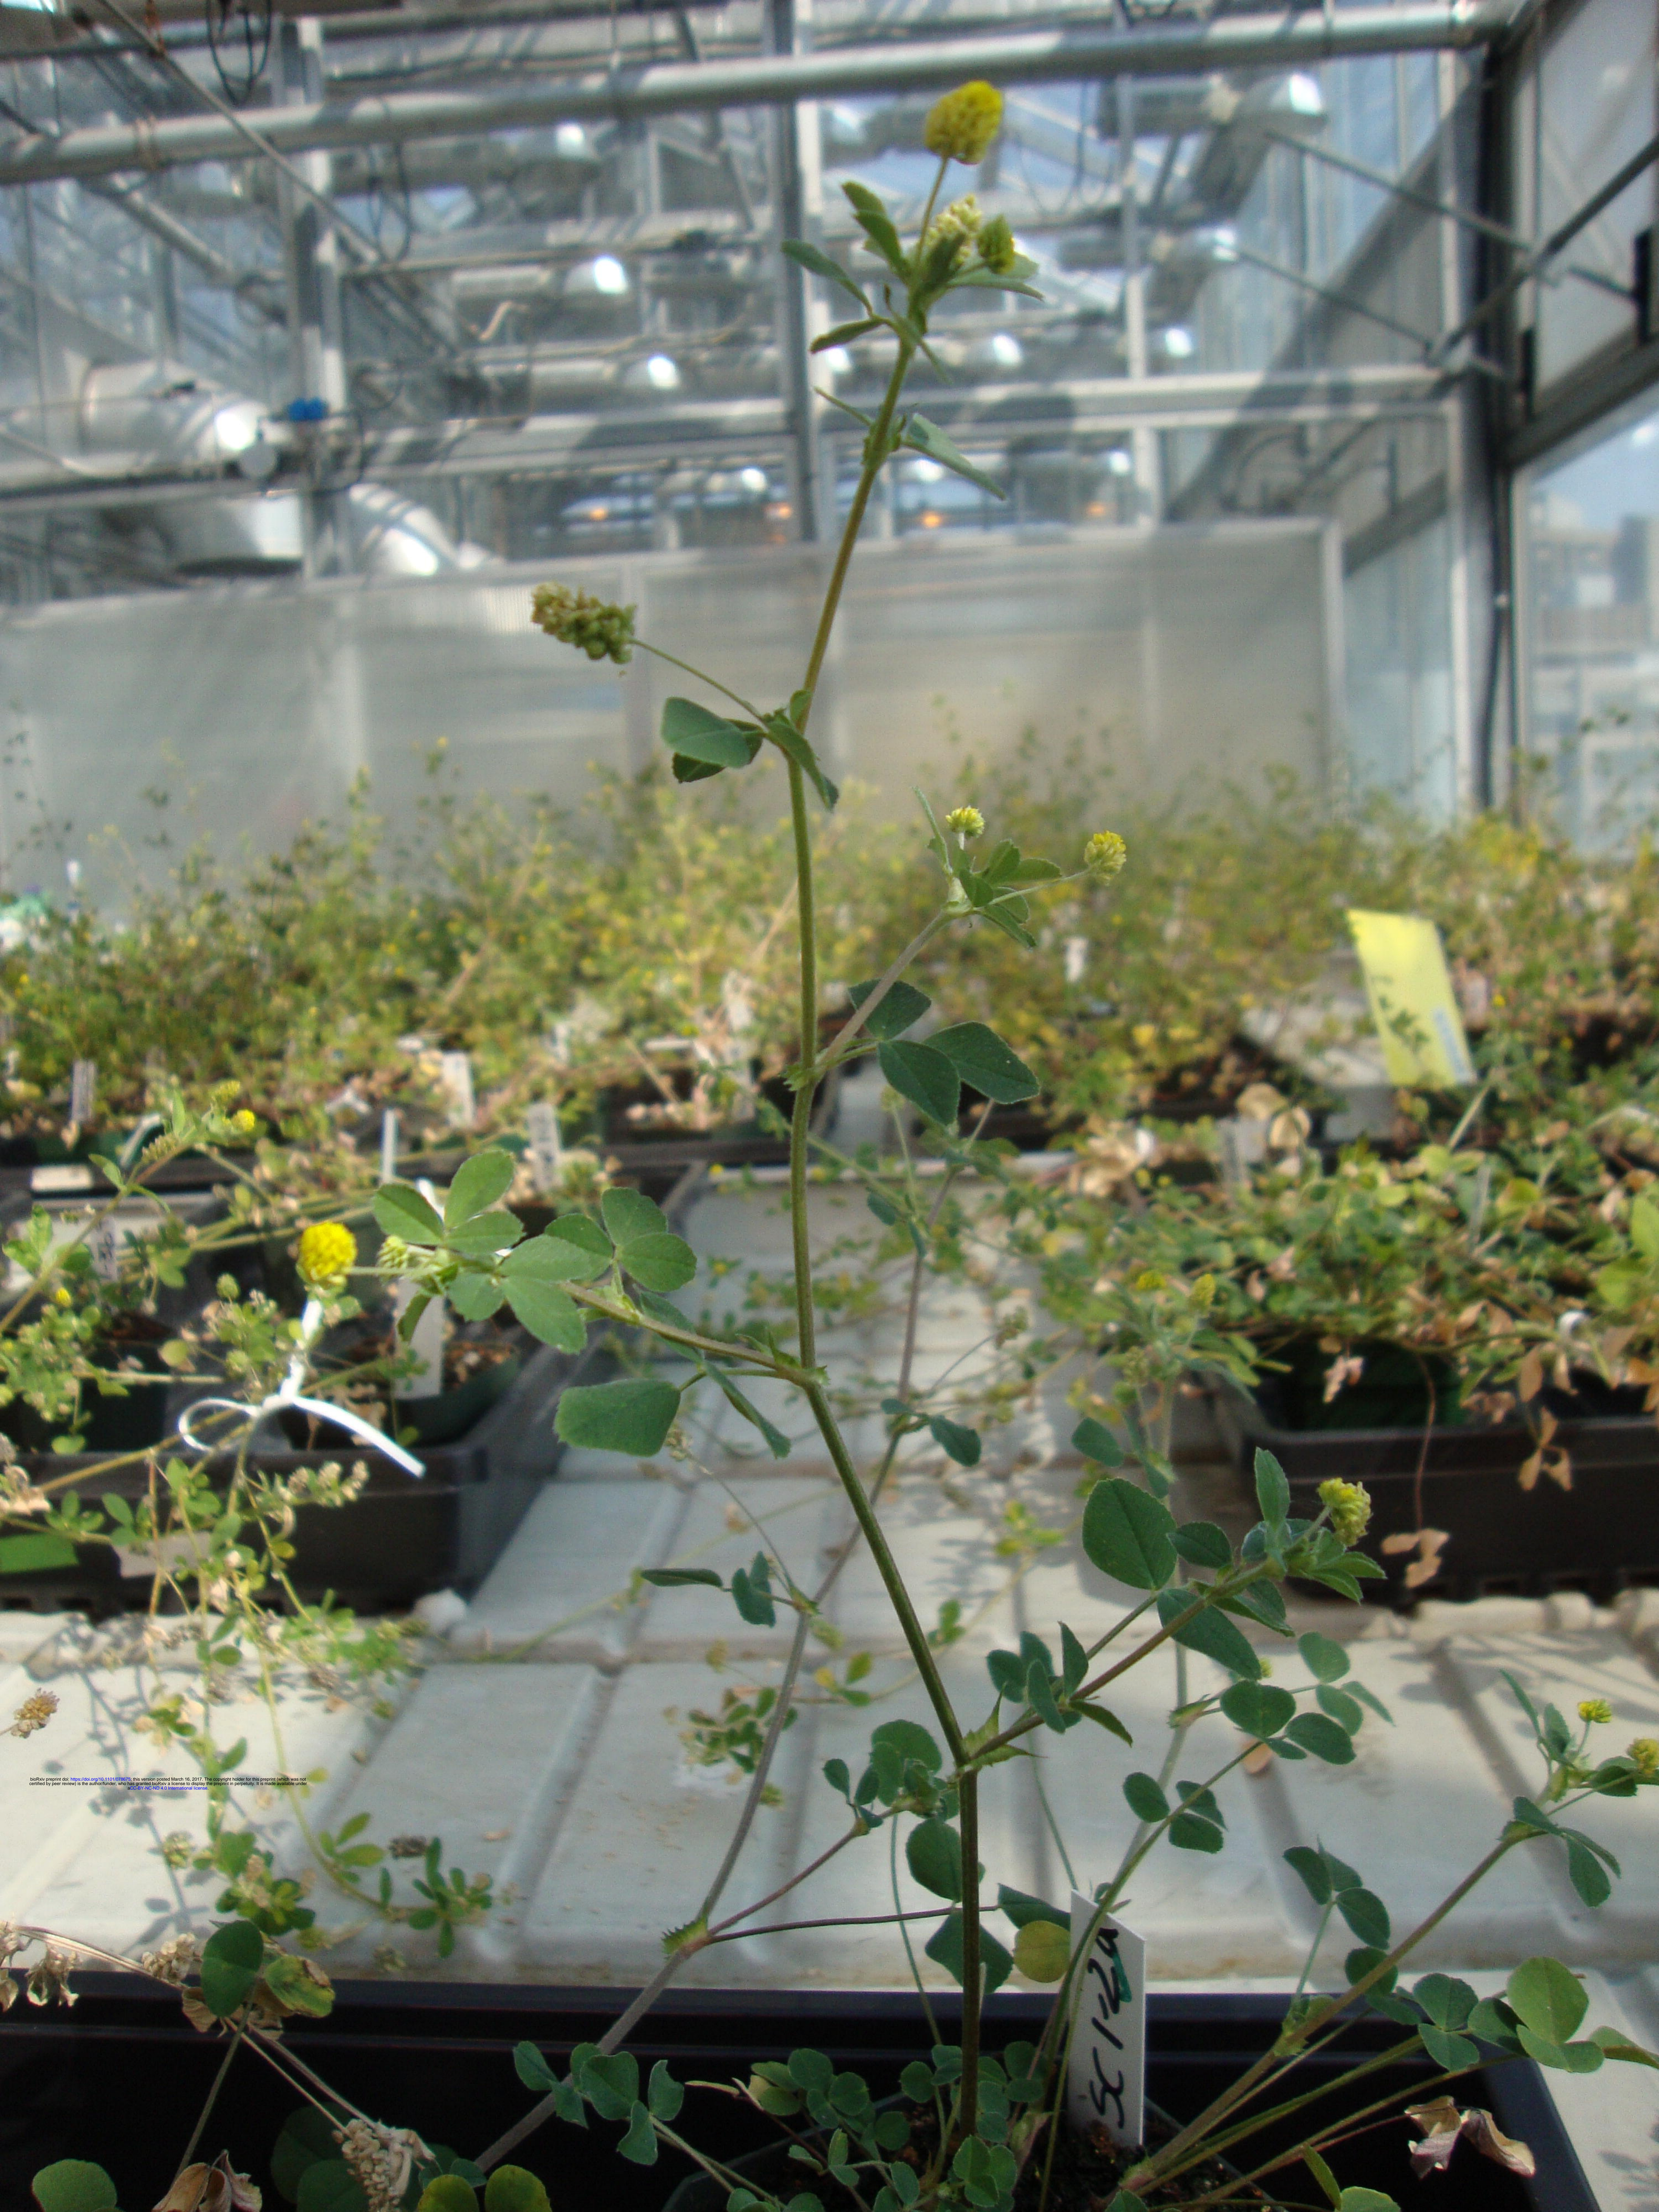

512a

bioRxiv preprint doi: <https://doi.org/10.1101/107820>; this version posted March 16, 2017. The copyright holder for this preprint (which was not certified by peer review) is the author/funder, who has granted bioRxiv a license to display the preprint in perpetuity. It is made available under aCC-BY-NC 4.0 International license.

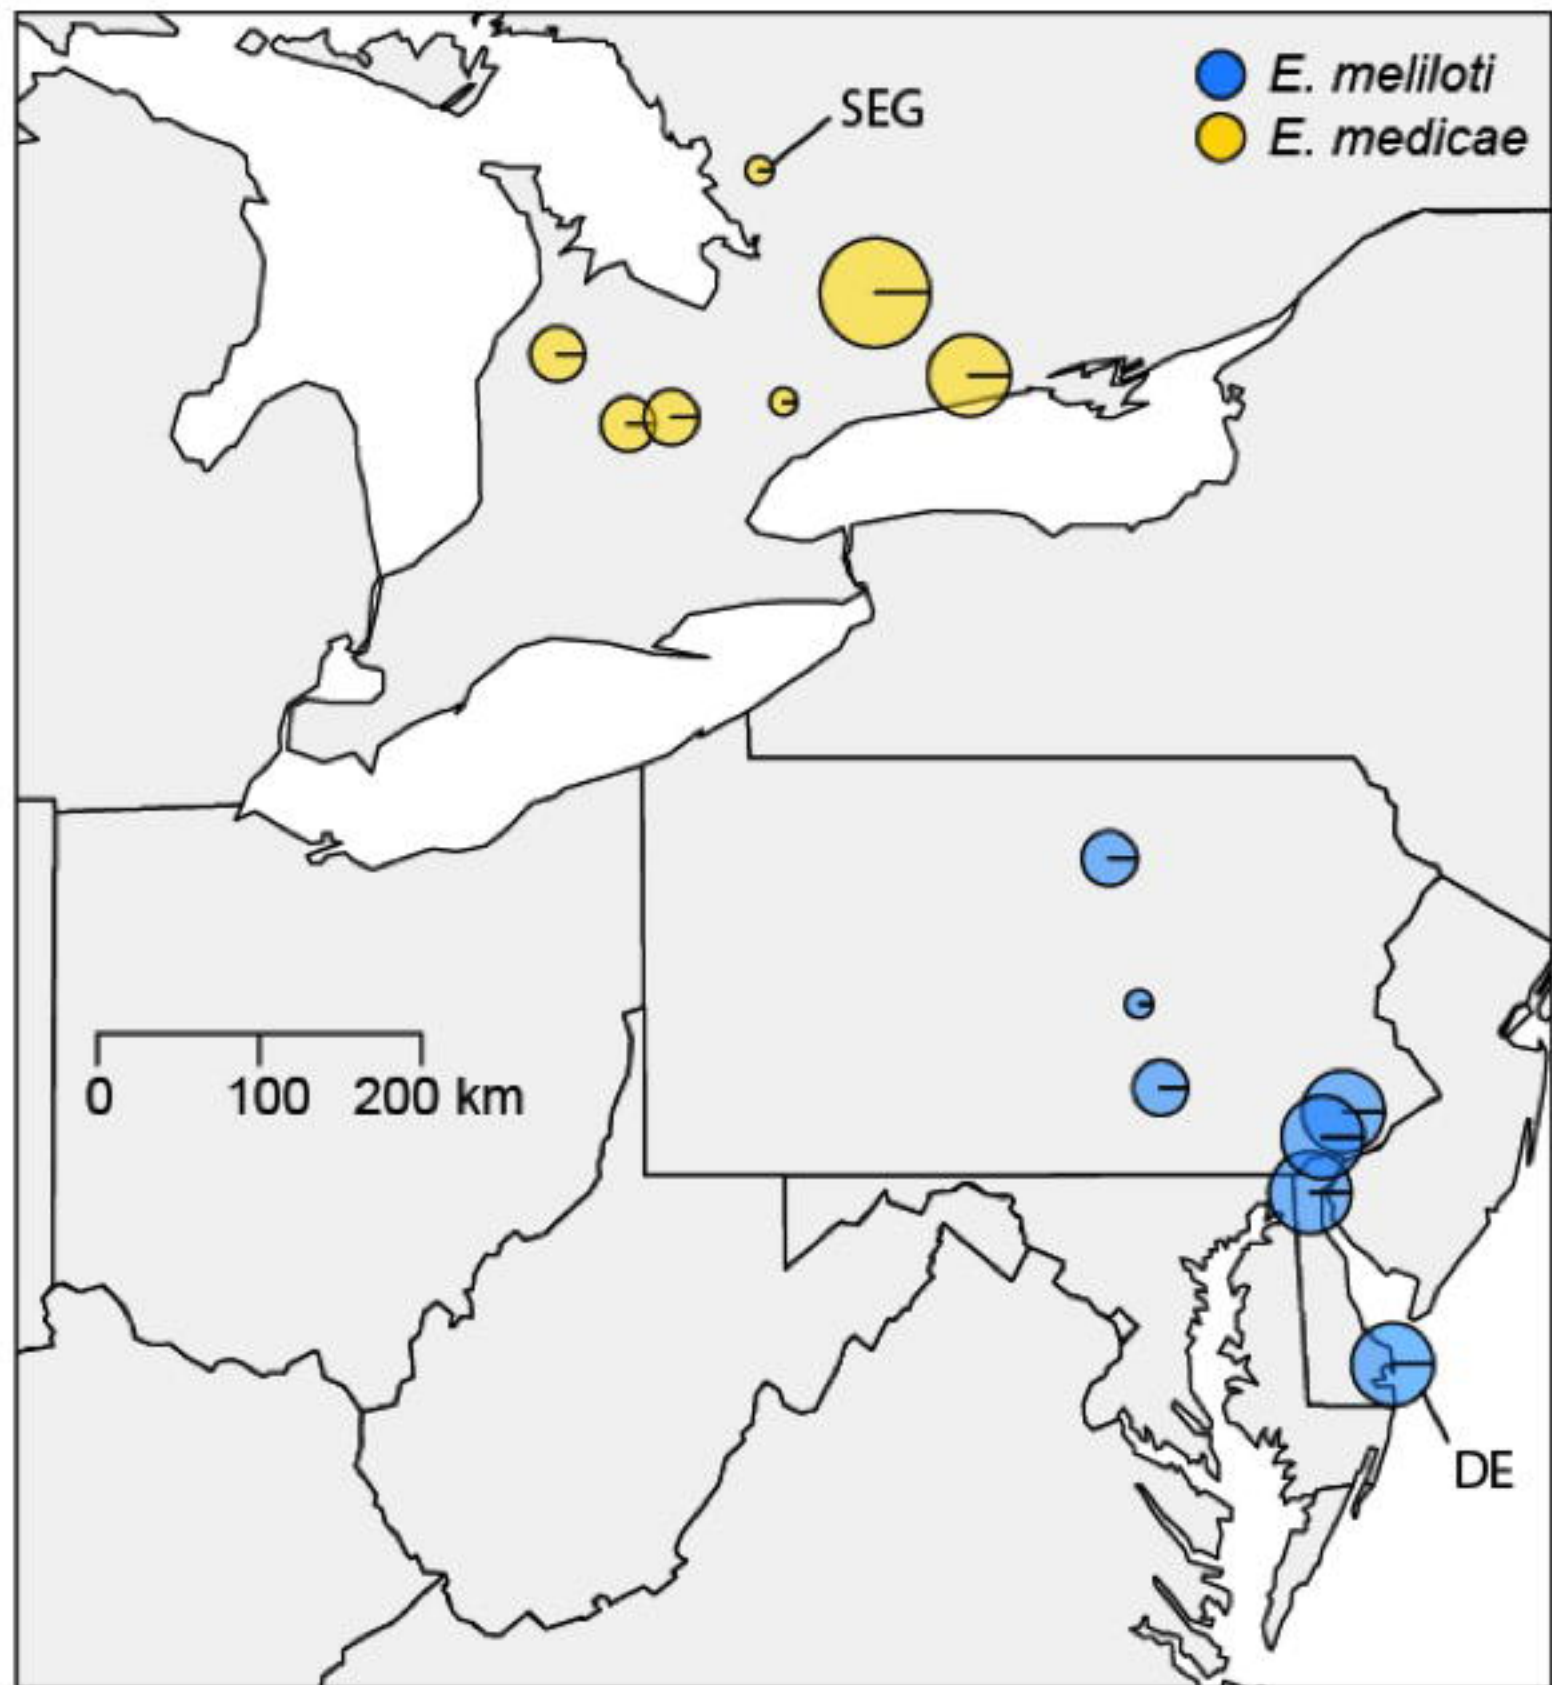

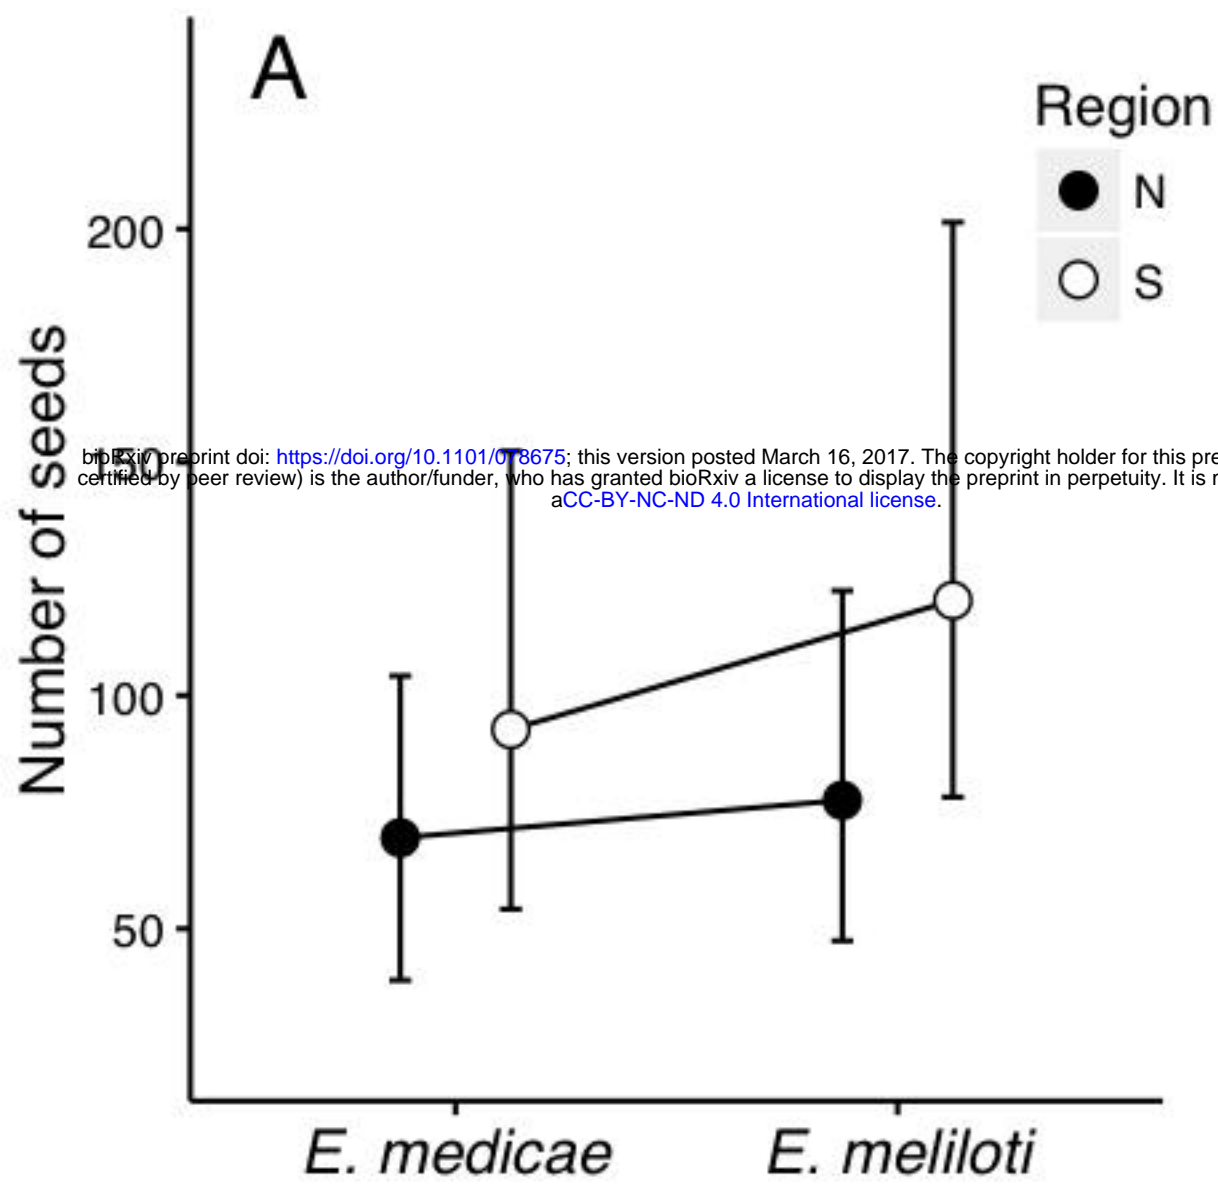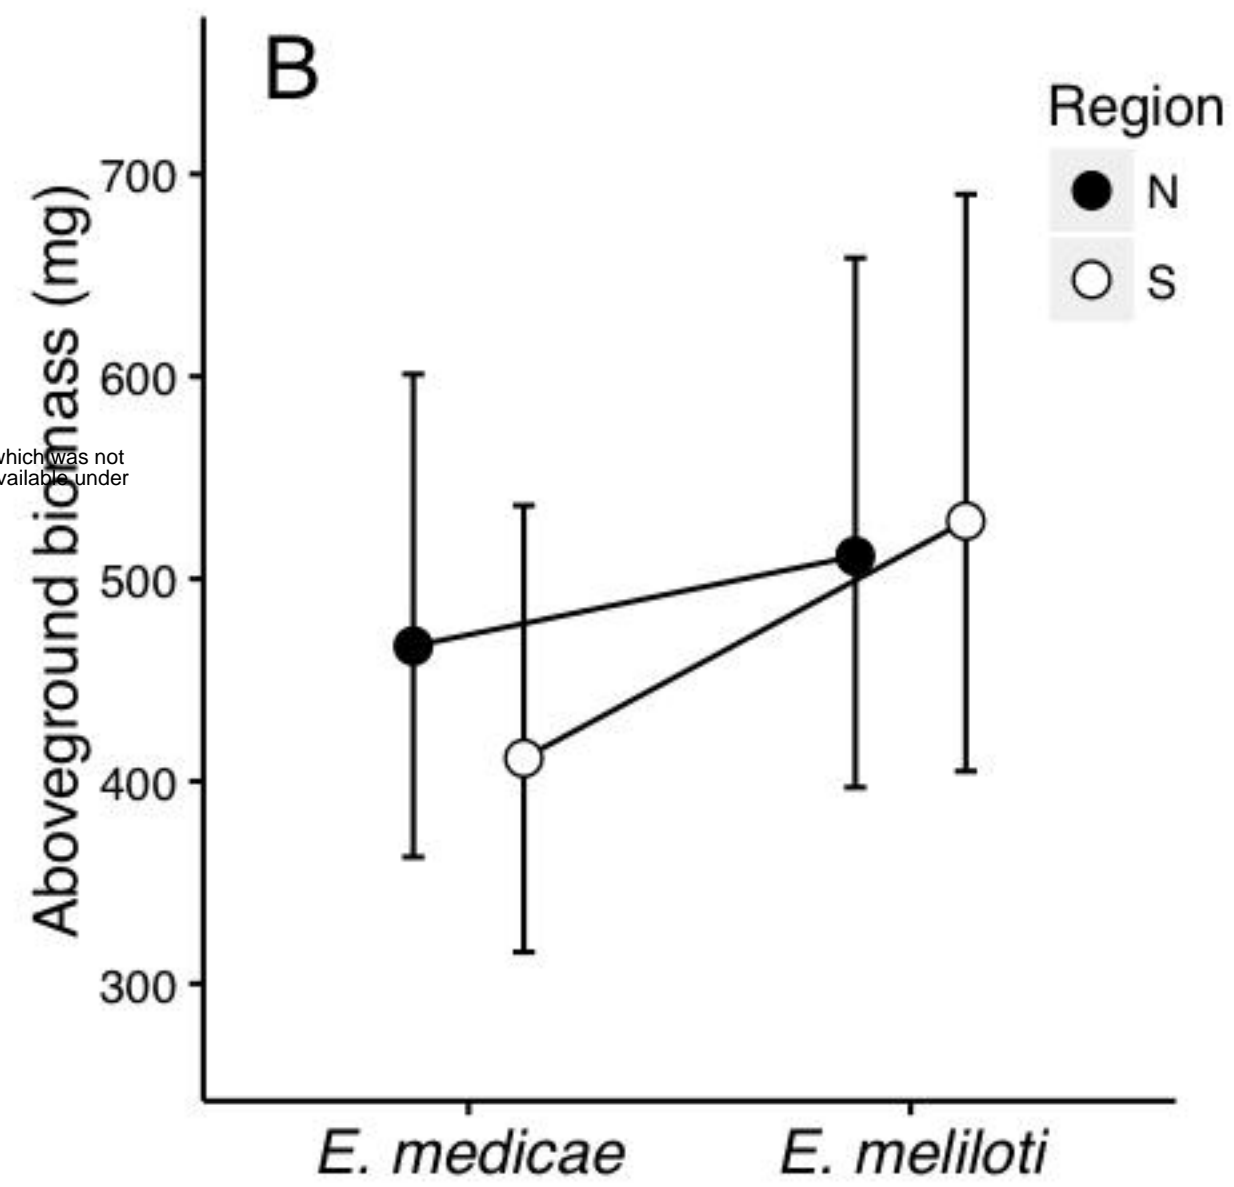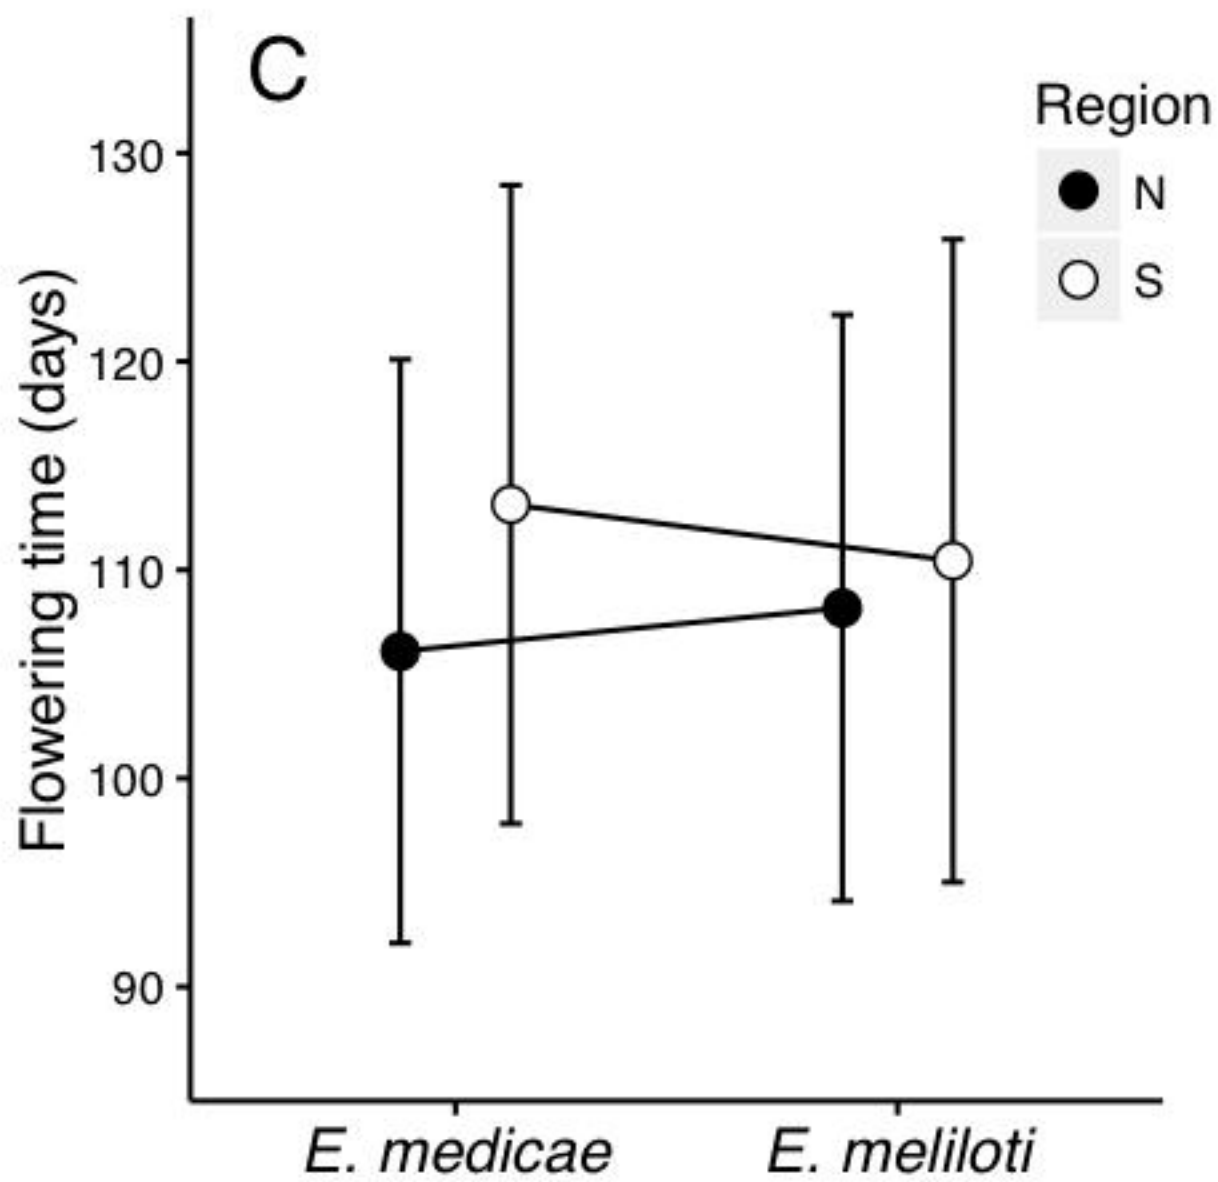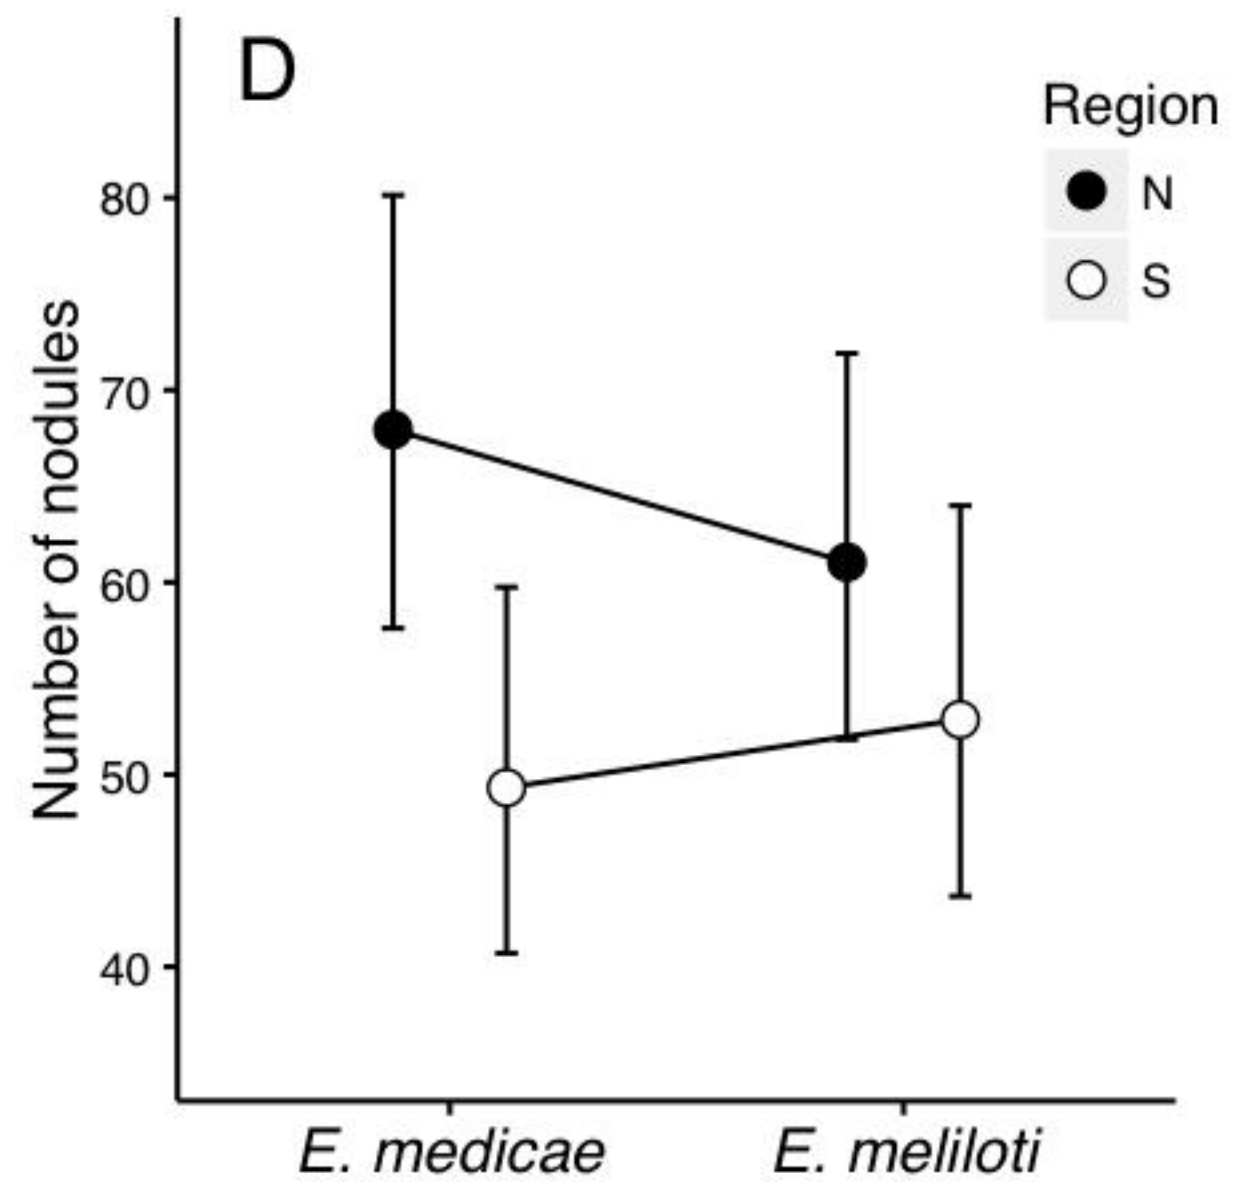

Source: https://www.biorxiv.org/content/10.1101/078675v2.full.pdf
